# Supplementary material
Source: publisher figshare collection journal article supplement (https://acs.figshare.com/ndownloader/files/5699682)
Supplement: Supplementary file 1 [file 5699682]

 
data_cy3sncl108
 
_audit_creation_date            2002-09-07T11:00:48-00:00
_audit_creation_method         'WinGX routine CIF_UPDATE'
_audit_conform_dict_name        cif_core.dic
_audit_conform_dict_version     2.2
_audit_conform_dict_location    ftp://ftp.iucr.org/pub/cif_core.dic
_publ_requested_category        FM
 
#----------------------------------------------------------------------------#
#                   CHEMICAL INFORMATION                                     #
#----------------------------------------------------------------------------#
 
_chemical_name_systematic
;
 ?
;
_chemical_name_common                   '[cy3SnCl] at 108K '
_chemical_formula_moiety                'C18 H33 Cl1 Sn1'
_chemical_formula_sum                   'C18 H33 Cl Sn'
_chemical_formula_weight                403.58
_chemical_compound_source               'synthesis as described'
 
#----------------------------------------------------------------------------#
#                   UNIT CELL INFORMATION                                    #
#----------------------------------------------------------------------------#
 
_symmetry_cell_setting                  monoclinic
_symmetry_space_group_name_H-M          P2(1)/c
_symmetry_Int_Tables_number             14
loop_
    _symmetry_equiv_pos_as_xyz
'x, y, z'
'-x, y+1/2, -z+1/2'
'-x, -y, -z'
'x, -y-1/2, z-1/2'
 
_cell_length_a                          10.7797(4)
_cell_length_b                          16.9558(5)
_cell_length_c                          10.9191(4)
_cell_angle_alpha                       90
_cell_angle_beta                        111.747(2)
_cell_angle_gamma                       90
_cell_volume                            1853.73(11)
_cell_formula_units_Z                   4
_cell_measurement_temperature           108(2)
_cell_measurement_reflns_used           36377
_cell_measurement_theta_min             3.705
_cell_measurement_theta_max             27.878
_cell_measurement_wavelength            0.71073
 
#----------------------------------------------------------------------------#
#                   CRYSTAL INFORMATION                                      #
#----------------------------------------------------------------------------#
 
_exptl_crystal_description              needle
_exptl_crystal_colour                   colourless
_exptl_crystal_size_max                 0.1
_exptl_crystal_size_mid                 0.1
_exptl_crystal_size_min                 0.1
_exptl_crystal_density_diffrn           1.446
_exptl_crystal_density_method           'not measured'
_exptl_crystal_F_000                    832
_exptl_special_details
;
 ?
;
 
#----------------------------------------------------------------------------#
#                   ABSORPTION CORRECTION                                    #
#----------------------------------------------------------------------------#
 
_exptl_absorpt_coefficient_mu           1.514
_exptl_absorpt_correction_type          multi-scan
_exptl_absorpt_process_details
;
        [c.f. r.h. blessing, acta cryst. (1995), a51, 33-38]
;
_exptl_absorpt_correction_T_min         0.8018
_exptl_absorpt_correction_T_max         0.8982
 
#----------------------------------------------------------------------------#
#                   DATA COLLECTION                                          #
#----------------------------------------------------------------------------#
 
_diffrn_ambient_temperature             108(2)
_diffrn_radiation_wavelength            0.71073
_diffrn_radiation_type                  MoK\a
_diffrn_radiation_monochromator         graphite
_diffrn_radiation_probe                 x-ray
_diffrn_measurement_device              '95mm CCD camera on \k-goniostat'
_diffrn_measurement_device_type         KappaCCD
_diffrn_measurement_method              CCD
_diffrn_reflns_av_R_equivalents         0.0551
_diffrn_reflns_av_unetI/netI            0.0583
_diffrn_reflns_number                   13895
_diffrn_reflns_limit_h_min              -10
_diffrn_reflns_limit_h_max              14
_diffrn_reflns_limit_k_min              -21
_diffrn_reflns_limit_k_max              22
_diffrn_reflns_limit_l_min              -14
_diffrn_reflns_limit_l_max              11
_diffrn_reflns_theta_min                3.77
_diffrn_reflns_theta_max                27.89
_diffrn_reflns_theta_full               27.89
_diffrn_measured_fraction_theta_full
                                        0.986
_diffrn_measured_fraction_theta_max
                                        0.986
_reflns_number_total                    4374
_reflns_number_gt                       2859
_reflns_threshold_expression            >2sigma(I)
 
#----------------------------------------------------------------------------#
#                   COMPUTER PROGRAMS USED                                   #
#----------------------------------------------------------------------------#
 
_computing_data_collection              'Collect (Nonius BV, 1997-2000)'
_computing_cell_refinement
                                       'HKL Scalepack (Otwinowski & Minor 1997)'
_computing_data_reduction
                             'HKL Denzo and Scalepack (Otwinowski & Minor 1997)'
_computing_structure_solution           'SHELXS-97 (Sheldrick, 1997)'
_computing_structure_refinement         'SHELXL-97 (Sheldrick, 1997)'
_computing_molecular_graphics           'Ortep-3 for Windows (Farrugia, 1997)'
_computing_publication_material
                                   'WinGX publication routines (Farrugia, 1999)'
 
#----------------------------------------------------------------------------#
#                   REFINEMENT INFORMATION                                   #
#----------------------------------------------------------------------------#
 
_refine_special_details
;
 Refinement of F^2^ against ALL reflections.  The weighted R-factor wR and
 goodness of fit S are based on F^2^, conventional R-factors R are based
 on F, with F set to zero for negative F^2^. The threshold expression of
 F^2^ > 2sigma(F^2^) is used only for calculating R-factors(gt) etc. and is
 not relevant to the choice of reflections for refinement.  R-factors based
 on F^2^ are statistically about twice as large as those based on F, and R-
 factors based on ALL data will be even larger.
;
_refine_ls_structure_factor_coef        Fsqd
_refine_ls_matrix_type                  full
_refine_ls_weighting_scheme             calc
_refine_ls_weighting_details
         'calc w=1/[\s^2^(Fo^2^)+(0.0272P)^2^+0.0000P] where P=(Fo^2^+2Fc^2^)/3'
_atom_sites_solution_primary            direct
_atom_sites_solution_secondary          difmap
_atom_sites_solution_hydrogens          geom
_refine_ls_hydrogen_treatment           riding
_refine_ls_extinction_method            none
_refine_ls_number_reflns                4374
_refine_ls_number_parameters            181
_refine_ls_number_restraints            0
_refine_ls_R_factor_all                 0.0668
_refine_ls_R_factor_gt                  0.0333
_refine_ls_wR_factor_ref                0.0754
_refine_ls_wR_factor_gt                 0.0664
_refine_ls_goodness_of_fit_ref          1.012
_refine_ls_restrained_S_all             1.012
_refine_ls_shift/su_max                 0.001
_refine_ls_shift/su_mean                0
_refine_diff_density_max                0.541
_refine_diff_density_min                -0.842
_refine_diff_density_rms                0.111
 
#----------------------------------------------------------------------------#
#                   ATOMIC TYPES, COORDINATES AND THERMAL PARAMETERS         #
#----------------------------------------------------------------------------#
 
loop_
    _atom_type_symbol
    _atom_type_description
    _atom_type_scat_dispersion_real
    _atom_type_scat_dispersion_imag
    _atom_type_scat_source
C C 0.0033 0.0016 'International Tables Vol C Tables 4.2.6.8 and 6.1.1.4'
H H 0 0 'International Tables Vol C Tables 4.2.6.8 and 6.1.1.4'
Cl Cl 0.1484 0.1585 'International Tables Vol C Tables 4.2.6.8 and 6.1.1.4'
Sn Sn -0.6537 1.4246 'International Tables Vol C Tables 4.2.6.8 and 6.1.1.4'
 
loop_
    _atom_site_label
    _atom_site_type_symbol
    _atom_site_fract_x
    _atom_site_fract_y
    _atom_site_fract_z
    _atom_site_U_iso_or_equiv
    _atom_site_adp_type
    _atom_site_occupancy
    _atom_site_symmetry_multiplicity
    _atom_site_calc_flag
    _atom_site_refinement_flags
    _atom_site_disorder_assembly
    _atom_site_disorder_group
Sn Sn 0.021199(18) 0.247762(11) 0.838737(17) 0.01503(8) Uani 1 1 d . . .
Cl Cl 0.02397(8) 0.23868(4) 1.06511(7) 0.02533(18) Uani 1 1 d . . .
C1 C 0.1197(3) 0.36083(14) 0.8514(3) 0.0167(6) Uani 1 1 d . . .
H1 H 0.0649 0.3909 0.7707 0.02 Uiso 1 1 calc R . .
C2 C 0.2607(3) 0.35651(15) 0.8497(3) 0.0218(7) Uani 1 1 d . . .
H2A H 0.2586 0.327 0.7707 0.026 Uiso 1 1 calc R . .
H2B H 0.3197 0.3277 0.9286 0.026 Uiso 1 1 calc R . .
C3 C 0.3169(3) 0.43954(16) 0.8479(3) 0.0272(8) Uani 1 1 d . . .
H3A H 0.4093 0.4353 0.8501 0.033 Uiso 1 1 calc R . .
H3B H 0.2623 0.4666 0.7652 0.033 Uiso 1 1 calc R . .
C4 C 0.3171(3) 0.48811(16) 0.9651(3) 0.0250(7) Uani 1 1 d . . .
H4A H 0.3787 0.4639 1.0477 0.03 Uiso 1 1 calc R . .
H4B H 0.3495 0.542 0.9589 0.03 Uiso 1 1 calc R . .
C5 C 0.1777(3) 0.49249(16) 0.9685(3) 0.0263(7) Uani 1 1 d . . .
H5A H 0.1184 0.522 0.8906 0.032 Uiso 1 1 calc R . .
H5B H 0.1811 0.5214 1.0485 0.032 Uiso 1 1 calc R . .
C6 C 0.1200(3) 0.40999(15) 0.9691(3) 0.0247(7) Uani 1 1 d . . .
H6A H 0.1738 0.3827 1.0519 0.03 Uiso 1 1 calc R . .
H6B H 0.0275 0.4148 0.9664 0.03 Uiso 1 1 calc R . .
C7 C -0.1944(3) 0.24917(14) 0.7428(3) 0.0190(6) Uani 1 1 d . . .
H7 H -0.2158 0.2537 0.6458 0.023 Uiso 1 1 calc R . .
C8 C -0.2570(3) 0.32019(16) 0.7841(3) 0.0248(7) Uani 1 1 d . . .
H8A H -0.2198 0.3693 0.7625 0.03 Uiso 1 1 calc R . .
H8B H -0.2337 0.3188 0.8807 0.03 Uiso 1 1 calc R . .
C9 C -0.4089(3) 0.32069(17) 0.7147(3) 0.0329(8) Uani 1 1 d . . .
H9A H -0.4323 0.3275 0.6186 0.04 Uiso 1 1 calc R . .
H9B H -0.4464 0.3659 0.7468 0.04 Uiso 1 1 calc R . .
C10 C -0.4706(3) 0.24412(17) 0.7398(4) 0.0339(8) Uani 1 1 d . . .
H10A H -0.4553 0.2399 0.8348 0.041 Uiso 1 1 calc R . .
H10B H -0.5682 0.2447 0.6896 0.041 Uiso 1 1 calc R . .
C11 C -0.4086(3) 0.17302(17) 0.6978(4) 0.0350(9) Uani 1 1 d . . .
H11A H -0.4454 0.1239 0.7198 0.042 Uiso 1 1 calc R . .
H11B H -0.4327 0.1744 0.6011 0.042 Uiso 1 1 calc R . .
C12 C -0.2565(3) 0.17251(16) 0.7661(3) 0.0277(8) Uani 1 1 d . . .
H12A H -0.2325 0.1648 0.862 0.033 Uiso 1 1 calc R . .
H12B H -0.2195 0.1277 0.7325 0.033 Uiso 1 1 calc R . .
C13 C 0.1195(3) 0.13670(14) 0.8353(3) 0.0170(6) Uani 1 1 d . . .
H13 H 0.0826 0.1176 0.742 0.02 Uiso 1 1 calc R . .
C14 C 0.2695(3) 0.14676(16) 0.8719(3) 0.0277(8) Uani 1 1 d . . .
H14A H 0.3095 0.1681 0.9625 0.033 Uiso 1 1 calc R . .
H14B H 0.2855 0.1853 0.8112 0.033 Uiso 1 1 calc R . .
C15 C 0.3380(3) 0.06861(17) 0.8644(3) 0.0333(8) Uani 1 1 d . . .
H15A H 0.3058 0.0502 0.7718 0.04 Uiso 1 1 calc R . .
H15B H 0.4357 0.0769 0.8944 0.04 Uiso 1 1 calc R . .
C16 C 0.3086(3) 0.00596(17) 0.9501(3) 0.0318(8) Uani 1 1 d . . .
H16A H 0.3499 -0.0447 0.9405 0.038 Uiso 1 1 calc R . .
H16B H 0.3481 0.0221 1.0439 0.038 Uiso 1 1 calc R . .
C17 C 0.1591(3) -0.00496(16) 0.9101(3) 0.0328(9) Uani 1 1 d . . .
H17A H 0.1418 -0.0448 0.9681 0.039 Uiso 1 1 calc R . .
H17B H 0.1211 -0.0249 0.8184 0.039 Uiso 1 1 calc R . .
C18 C 0.0898(3) 0.07237(16) 0.9194(3) 0.0285(8) Uani 1 1 d . . .
H18A H 0.1213 0.0898 1.0124 0.034 Uiso 1 1 calc R . .
H18B H -0.0078 0.0637 0.8886 0.034 Uiso 1 1 calc R . .
 
loop_
    _atom_site_aniso_label
    _atom_site_aniso_U_11
    _atom_site_aniso_U_22
    _atom_site_aniso_U_33
    _atom_site_aniso_U_23
    _atom_site_aniso_U_13
    _atom_site_aniso_U_12
Sn 0.01153(11) 0.02022(12) 0.01356(11) -0.00040(9) 0.00492(8) 0.00055(9)
Cl 0.0299(4) 0.0327(4) 0.0155(4) -0.0006(3) 0.0108(3) -0.0002(3)
C1 0.0143(18) 0.0197(15) 0.0155(16) 0.0005(11) 0.0050(13) 0.0003(12)
C2 0.0176(19) 0.0215(15) 0.0289(18) -0.0043(13) 0.0118(15) -0.0006(13)
C3 0.0200(19) 0.0289(17) 0.036(2) -0.0027(14) 0.0144(16) -0.0048(14)
C4 0.0171(19) 0.0209(15) 0.033(2) -0.0021(13) 0.0044(15) -0.0031(13)
C5 0.0245(19) 0.0226(16) 0.0299(19) -0.0076(13) 0.0081(16) -0.0008(14)
C6 0.0220(19) 0.0259(16) 0.0262(18) -0.0073(13) 0.0090(15) -0.0028(14)
C7 0.0125(14) 0.0279(15) 0.0162(14) -0.0022(13) 0.0050(12) 0.0003(13)
C8 0.0162(18) 0.0214(15) 0.035(2) -0.0019(13) 0.0070(16) 0.0005(13)
C9 0.016(2) 0.0325(18) 0.049(2) -0.0024(16) 0.0107(17) 0.0057(15)
C10 0.0138(16) 0.046(2) 0.044(2) 0.0008(18) 0.0136(15) -0.0014(15)
C11 0.024(2) 0.0266(18) 0.051(2) -0.0034(16) 0.0095(18) -0.0066(15)
C12 0.0163(19) 0.0242(17) 0.041(2) -0.0047(14) 0.0088(16) -0.0021(14)
C13 0.0133(18) 0.0200(15) 0.0197(16) -0.0006(12) 0.0085(14) 0.0027(12)
C14 0.016(2) 0.0227(16) 0.044(2) -0.0002(14) 0.0106(17) 0.0032(14)
C15 0.021(2) 0.0319(18) 0.044(2) -0.0029(16) 0.0093(17) 0.0077(15)
C16 0.029(2) 0.0316(18) 0.0291(19) -0.0002(14) 0.0036(17) 0.0117(15)
C17 0.038(2) 0.0208(16) 0.043(2) 0.0097(15) 0.0192(19) 0.0049(15)
C18 0.027(2) 0.0269(17) 0.035(2) 0.0098(14) 0.0159(17) 0.0045(14)
 
 
#----------------------------------------------------------------------------#
#                   MOLECULAR GEOMETRY                                       #
#----------------------------------------------------------------------------#
 
_geom_special_details
;
 All esds (except the esd in the dihedral angle between two l.s. planes)
 are estimated using the full covariance matrix.  The cell esds are taken
 into account individually in the estimation of esds in distances, angles
 and torsion angles; correlations between esds in cell parameters are only
 used when they are defined by crystal symmetry.  An approximate (isotropic)
 treatment of cell esds is used for estimating esds involving l.s. planes.
;
loop_
    _geom_bond_atom_site_label_1
    _geom_bond_atom_site_label_2
    _geom_bond_distance
    _geom_bond_site_symmetry_2
    _geom_bond_publ_flag
Sn C7 2.167(3) . ?
Sn C13 2.168(2) . ?
Sn C1 2.171(3) . ?
Sn Cl 2.4657(7) . ?
Sn Cl 3.0077(7) 4_565 ?
Cl Sn 3.0077(7) 4_566 ?
C1 C2 1.528(4) . ?
C1 C6 1.531(4) . ?
C2 C3 1.536(4) . ?
C3 C4 1.521(4) . ?
C4 C5 1.519(4) . ?
C5 C6 1.531(4) . ?
C7 C12 1.526(4) . ?
C7 C8 1.528(4) . ?
C8 C9 1.528(4) . ?
C9 C10 1.530(4) . ?
C10 C11 1.529(4) . ?
C11 C12 1.529(4) . ?
C13 C14 1.525(4) . ?
C13 C18 1.534(4) . ?
C14 C15 1.534(4) . ?
C15 C16 1.525(4) . ?
C16 C17 1.517(4) . ?
C17 C18 1.531(4) . ?
 
loop_
    _geom_angle_atom_site_label_1
    _geom_angle_atom_site_label_2
    _geom_angle_atom_site_label_3
    _geom_angle
    _geom_angle_site_symmetry_1
    _geom_angle_site_symmetry_3
    _geom_angle_publ_flag
C7 Sn C13 116.41(10) . . ?
C7 Sn C1 115.65(10) . . ?
C13 Sn C1 122.50(10) . . ?
C7 Sn Cl 95.62(7) . . ?
C13 Sn Cl 97.98(8) . . ?
C1 Sn Cl 99.64(7) . . ?
C7 Sn Cl 85.55(7) . 4_565 ?
C13 Sn Cl 82.20(7) . 4_565 ?
C1 Sn Cl 79.11(7) . 4_565 ?
Cl Sn Cl 178.58(3) . 4_565 ?
Sn Cl Sn 171.95(3) . 4_566 ?
C2 C1 C6 110.1(2) . . ?
C2 C1 Sn 114.97(17) . . ?
C6 C1 Sn 112.52(18) . . ?
C1 C2 C3 110.8(2) . . ?
C4 C3 C2 111.3(2) . . ?
C5 C4 C3 110.8(2) . . ?
C4 C5 C6 111.2(2) . . ?
C1 C6 C5 111.6(2) . . ?
C12 C7 C8 110.7(2) . . ?
C12 C7 Sn 111.61(18) . . ?
C8 C7 Sn 112.20(18) . . ?
C7 C8 C9 111.5(2) . . ?
C8 C9 C10 111.3(3) . . ?
C11 C10 C9 110.3(3) . . ?
C12 C11 C10 111.5(3) . . ?
C7 C12 C11 111.8(2) . . ?
C14 C13 C18 111.0(2) . . ?
C14 C13 Sn 112.09(17) . . ?
C18 C13 Sn 113.30(19) . . ?
C13 C14 C15 112.0(2) . . ?
C16 C15 C14 110.9(3) . . ?
C17 C16 C15 110.4(3) . . ?
C16 C17 C18 111.6(3) . . ?
C17 C18 C13 110.8(2) . . ?
 
#===END

 
 
data_cy3sncl148
 
_audit_creation_date            2002-09-06T16:07:58-00:00
_audit_creation_method         'WinGX routine CIF_UPDATE'
_audit_conform_dict_name        cif_core.dic
_audit_conform_dict_version     2.2
_audit_conform_dict_location    ftp://ftp.iucr.org/pub/cif_core.dic
_publ_requested_category        FM
 
#----------------------------------------------------------------------------#
#                   CHEMICAL INFORMATION                                     #
#----------------------------------------------------------------------------#
 
_chemical_name_systematic
;
 ?
;
_chemical_name_common                   '[cy3SnCl] at 148K '
_chemical_formula_moiety                'C18 H33 Cl1 Sn1'
_chemical_formula_sum                   'C18 H33 Cl Sn'
_chemical_formula_weight                403.58
_chemical_compound_source               'synthesis as described'
 
#----------------------------------------------------------------------------#
#                   UNIT CELL INFORMATION                                    #
#----------------------------------------------------------------------------#
 
_symmetry_cell_setting                  monoclinic
_symmetry_space_group_name_H-M          P2(1)/c
_symmetry_Int_Tables_number             14
loop_
    _symmetry_equiv_pos_as_xyz
'x, y, z'
'-x, y+1/2, -z+1/2'
'-x, -y, -z'
'x, -y-1/2, z-1/2'
 
_cell_length_a                          10.7814(3)
_cell_length_b                          16.9696(5)
_cell_length_c                          10.9668(3)
_cell_angle_alpha                       90
_cell_angle_beta                        111.475(1)
_cell_angle_gamma                       90
_cell_volume                            1867.15(9)
_cell_formula_units_Z                   4
_cell_measurement_temperature           148(2)
_cell_measurement_reflns_used           42745
_cell_measurement_theta_min             3.705
_cell_measurement_theta_max             27.878
_cell_measurement_wavelength            0.71073
 
#----------------------------------------------------------------------------#
#                   CRYSTAL INFORMATION                                      #
#----------------------------------------------------------------------------#
 
_exptl_crystal_description              needle
_exptl_crystal_colour                   colourless
_exptl_crystal_size_max                 0.1
_exptl_crystal_size_mid                 0.1
_exptl_crystal_size_min                 0.1
_exptl_crystal_density_diffrn           1.436
_exptl_crystal_density_method           'not measured'
_exptl_crystal_F_000                    832
_exptl_special_details
;
 ?
;
 
#----------------------------------------------------------------------------#
#                   ABSORPTION CORRECTION                                    #
#----------------------------------------------------------------------------#
 
_exptl_absorpt_coefficient_mu           1.503
_exptl_absorpt_correction_type          multi-scan
_exptl_absorpt_process_details
;
        [c.f. r.h. blessing, acta cryst. (1995), a51, 33-38]
;
_exptl_absorpt_correction_T_min         0.8163
_exptl_absorpt_correction_T_max         0.8841
 
#----------------------------------------------------------------------------#
#                   DATA COLLECTION                                          #
#----------------------------------------------------------------------------#
 
_diffrn_ambient_temperature             148(2)
_diffrn_radiation_wavelength            0.71073
_diffrn_radiation_type                  MoK\a
_diffrn_radiation_monochromator         graphite
_diffrn_radiation_probe                 x-ray
_diffrn_measurement_device              '95mm CCD camera on \k-goniostat'
_diffrn_measurement_device_type         KappaCCD
_diffrn_measurement_method              CCD
_diffrn_reflns_av_R_equivalents         0.0516
_diffrn_reflns_av_unetI/netI            0.0535
_diffrn_reflns_number                   16322
_diffrn_reflns_limit_h_min              -12
_diffrn_reflns_limit_h_max              14
_diffrn_reflns_limit_k_min              -20
_diffrn_reflns_limit_k_max              22
_diffrn_reflns_limit_l_min              -14
_diffrn_reflns_limit_l_max              11
_diffrn_reflns_theta_min                3.76
_diffrn_reflns_theta_max                27.88
_diffrn_reflns_theta_full               27.88
_diffrn_measured_fraction_theta_full
                                        0.994
_diffrn_measured_fraction_theta_max
                                        0.994
_reflns_number_total                    4444
_reflns_number_gt                       2910
_reflns_threshold_expression            >2sigma(I)
 
#----------------------------------------------------------------------------#
#                   COMPUTER PROGRAMS USED                                   #
#----------------------------------------------------------------------------#
 
_computing_data_collection              'Collect (Nonius BV, 1997-2000)'
_computing_cell_refinement
                                       'HKL Scalepack (Otwinowski & Minor 1997)'
_computing_data_reduction
                             'HKL Denzo and Scalepack (Otwinowski & Minor 1997)'
_computing_structure_solution           'SHELXS-97 (Sheldrick, 1997)'
_computing_structure_refinement         'SHELXL-97 (Sheldrick, 1997)'
_computing_molecular_graphics           'Ortep-3 for Windows (Farrugia, 1997)'
_computing_publication_material
                                   'WinGX publication routines (Farrugia, 1999)'
 
#----------------------------------------------------------------------------#
#                   REFINEMENT INFORMATION                                   #
#----------------------------------------------------------------------------#
 
_refine_special_details
;
 Refinement of F^2^ against ALL reflections.  The weighted R-factor wR and
 goodness of fit S are based on F^2^, conventional R-factors R are based
 on F, with F set to zero for negative F^2^. The threshold expression of
 F^2^ > 2sigma(F^2^) is used only for calculating R-factors(gt) etc. and is
 not relevant to the choice of reflections for refinement.  R-factors based
 on F^2^ are statistically about twice as large as those based on F, and R-
 factors based on ALL data will be even larger.
;
_refine_ls_structure_factor_coef        Fsqd
_refine_ls_matrix_type                  full
_refine_ls_weighting_scheme             calc
_refine_ls_weighting_details
         'calc w=1/[\s^2^(Fo^2^)+(0.0223P)^2^+0.3418P] where P=(Fo^2^+2Fc^2^)/3'
_atom_sites_solution_primary            direct
_atom_sites_solution_secondary          difmap
_atom_sites_solution_hydrogens          geom
_refine_ls_hydrogen_treatment           riding
_refine_ls_extinction_method            none
_refine_ls_number_reflns                4444
_refine_ls_number_parameters            181
_refine_ls_number_restraints            0
_refine_ls_R_factor_all                 0.0643
_refine_ls_R_factor_gt                  0.0313
_refine_ls_wR_factor_ref                0.0678
_refine_ls_wR_factor_gt                 0.0602
_refine_ls_goodness_of_fit_ref          1.01
_refine_ls_restrained_S_all             1.01
_refine_ls_shift/su_max                 0.001
_refine_ls_shift/su_mean                0
_refine_diff_density_max                0.433
_refine_diff_density_min                -0.704
_refine_diff_density_rms                0.096
 
#----------------------------------------------------------------------------#
#                   ATOMIC TYPES, COORDINATES AND THERMAL PARAMETERS         #
#----------------------------------------------------------------------------#
 
loop_
    _atom_type_symbol
    _atom_type_description
    _atom_type_scat_dispersion_real
    _atom_type_scat_dispersion_imag
    _atom_type_scat_source
C C 0.0033 0.0016 'International Tables Vol C Tables 4.2.6.8 and 6.1.1.4'
H H 0 0 'International Tables Vol C Tables 4.2.6.8 and 6.1.1.4'
Cl Cl 0.1484 0.1585 'International Tables Vol C Tables 4.2.6.8 and 6.1.1.4'
Sn Sn -0.6537 1.4246 'International Tables Vol C Tables 4.2.6.8 and 6.1.1.4'
 
loop_
    _atom_site_label
    _atom_site_type_symbol
    _atom_site_fract_x
    _atom_site_fract_y
    _atom_site_fract_z
    _atom_site_U_iso_or_equiv
    _atom_site_adp_type
    _atom_site_occupancy
    _atom_site_symmetry_multiplicity
    _atom_site_calc_flag
    _atom_site_refinement_flags
    _atom_site_disorder_assembly
    _atom_site_disorder_group
Sn Sn 0.022148(16) 0.247062(10) 0.842676(16) 0.01786(7) Uani 1 1 d . . .
Cl Cl 0.02488(8) 0.23738(4) 1.06754(7) 0.03205(19) Uani 1 1 d . . .
C1 C 0.1210(3) 0.36005(14) 0.8557(3) 0.0211(6) Uani 1 1 d . . .
H1 H 0.0662 0.3902 0.7757 0.025 Uiso 1 1 calc R . .
C2 C 0.2610(3) 0.35591(15) 0.8526(3) 0.0264(7) Uani 1 1 d . . .
H2A H 0.2588 0.3263 0.7741 0.032 Uiso 1 1 calc R . .
H2B H 0.3204 0.3274 0.931 0.032 Uiso 1 1 calc R . .
C3 C 0.3163(3) 0.43891(16) 0.8497(3) 0.0345(8) Uani 1 1 d . . .
H3A H 0.4083 0.4349 0.8508 0.041 Uiso 1 1 calc R . .
H3B H 0.261 0.4657 0.7676 0.041 Uiso 1 1 calc R . .
C4 C 0.3168(3) 0.48735(16) 0.9662(3) 0.0324(8) Uani 1 1 d . . .
H4A H 0.3486 0.5413 0.9595 0.039 Uiso 1 1 calc R . .
H4B H 0.379 0.4634 1.0481 0.039 Uiso 1 1 calc R . .
C5 C 0.1778(3) 0.49139(16) 0.9716(3) 0.0338(8) Uani 1 1 d . . .
H5A H 0.1182 0.5209 0.8946 0.041 Uiso 1 1 calc R . .
H5B H 0.1818 0.5201 1.0514 0.041 Uiso 1 1 calc R . .
C6 C 0.1206(3) 0.40891(15) 0.9725(3) 0.0297(7) Uani 1 1 d . . .
H6A H 0.1743 0.3817 1.0548 0.036 Uiso 1 1 calc R . .
H6B H 0.0282 0.4135 0.97 0.036 Uiso 1 1 calc R . .
C7 C -0.1934(3) 0.24865(15) 0.7462(3) 0.0227(6) Uani 1 1 d . . .
H7 H -0.214 0.2538 0.6499 0.027 Uiso 1 1 calc R . .
C8 C -0.2555(3) 0.31885(17) 0.7884(3) 0.0357(8) Uani 1 1 d . . .
H8A H -0.2179 0.3681 0.7681 0.043 Uiso 1 1 calc R . .
H8B H -0.233 0.3167 0.8844 0.043 Uiso 1 1 calc R . .
C9 C -0.4072(3) 0.31979(18) 0.7191(4) 0.0458(9) Uani 1 1 d . . .
H9A H -0.4448 0.3646 0.752 0.055 Uiso 1 1 calc R . .
H9B H -0.4299 0.3274 0.6238 0.055 Uiso 1 1 calc R . .
C10 C -0.4688(3) 0.24372(18) 0.7420(4) 0.0456(9) Uani 1 1 d . . .
H10A H -0.4543 0.2388 0.8362 0.055 Uiso 1 1 calc R . .
H10B H -0.566 0.2447 0.6919 0.055 Uiso 1 1 calc R . .
C11 C -0.4078(3) 0.17351(18) 0.6996(4) 0.0487(10) Uani 1 1 d . . .
H11A H -0.4311 0.1755 0.6036 0.058 Uiso 1 1 calc R . .
H11B H -0.4456 0.1244 0.7204 0.058 Uiso 1 1 calc R . .
C12 C -0.2558(3) 0.17206(17) 0.7680(3) 0.0393(9) Uani 1 1 d . . .
H12A H -0.2325 0.1637 0.8631 0.047 Uiso 1 1 calc R . .
H12B H -0.2191 0.1275 0.7337 0.047 Uiso 1 1 calc R . .
C13 C 0.1204(3) 0.13601(14) 0.8381(3) 0.0206(6) Uani 1 1 d . . .
H13 H 0.0856 0.118 0.7448 0.025 Uiso 1 1 calc R . .
C14 C 0.2704(3) 0.14604(16) 0.8773(3) 0.0363(8) Uani 1 1 d . . .
H14A H 0.3086 0.1664 0.9681 0.044 Uiso 1 1 calc R . .
H14B H 0.2883 0.1852 0.8189 0.044 Uiso 1 1 calc R . .
C15 C 0.3383(3) 0.06793(17) 0.8688(4) 0.0420(9) Uani 1 1 d . . .
H15A H 0.3082 0.0507 0.7763 0.05 Uiso 1 1 calc R . .
H15B H 0.4361 0.0757 0.9007 0.05 Uiso 1 1 calc R . .
C16 C 0.3056(3) 0.00438(18) 0.9504(3) 0.0398(9) Uani 1 1 d . . .
H16A H 0.3474 -0.046 0.9407 0.048 Uiso 1 1 calc R . .
H16B H 0.3422 0.0195 1.0441 0.048 Uiso 1 1 calc R . .
C17 C 0.1556(3) -0.00635(16) 0.9063(3) 0.0424(9) Uani 1 1 d . . .
H17A H 0.1357 -0.0471 0.9611 0.051 Uiso 1 1 calc R . .
H17B H 0.1201 -0.0248 0.8143 0.051 Uiso 1 1 calc R . .
C18 C 0.0870(3) 0.07134(16) 0.9172(3) 0.0363(8) Uani 1 1 d . . .
H18A H -0.0107 0.0634 0.8846 0.044 Uiso 1 1 calc R . .
H18B H 0.1167 0.0875 1.0103 0.044 Uiso 1 1 calc R . .
 
loop_
    _atom_site_aniso_label
    _atom_site_aniso_U_11
    _atom_site_aniso_U_22
    _atom_site_aniso_U_33
    _atom_site_aniso_U_23
    _atom_site_aniso_U_13
    _atom_site_aniso_U_12
Sn 0.01405(10) 0.02345(11) 0.01638(10) -0.00064(9) 0.00591(7) 0.00068(9)
Cl 0.0410(5) 0.0397(5) 0.0189(3) -0.0006(3) 0.0149(3) -0.0010(3)
C1 0.0179(17) 0.0227(14) 0.0230(16) 0.0002(11) 0.0080(13) 0.0012(12)
C2 0.0241(18) 0.0262(16) 0.0308(17) -0.0069(12) 0.0122(14) -0.0024(13)
C3 0.0260(19) 0.0337(17) 0.047(2) -0.0034(15) 0.0179(16) -0.0059(14)
C4 0.028(2) 0.0242(16) 0.042(2) -0.0025(14) 0.0086(16) -0.0042(14)
C5 0.034(2) 0.0286(17) 0.0382(19) -0.0111(14) 0.0125(16) -0.0016(14)
C6 0.0269(18) 0.0296(16) 0.0348(18) -0.0073(13) 0.0139(15) 0.0002(14)
C7 0.0132(13) 0.0349(16) 0.0191(13) -0.0022(13) 0.0046(11) 0.0006(13)
C8 0.0238(19) 0.0301(17) 0.051(2) -0.0037(15) 0.0115(17) 0.0023(14)
C9 0.021(2) 0.042(2) 0.073(3) -0.0039(18) 0.0152(18) 0.0075(16)
C10 0.0178(16) 0.064(2) 0.058(2) 0.0065(19) 0.0181(16) -0.0010(17)
C11 0.023(2) 0.040(2) 0.075(3) -0.0064(18) 0.0079(19) -0.0074(16)
C12 0.0199(19) 0.0298(17) 0.064(2) -0.0084(16) 0.0098(17) -0.0009(14)
C13 0.0180(17) 0.0226(14) 0.0208(15) 0.0006(11) 0.0067(13) 0.0040(12)
C14 0.0186(19) 0.0295(17) 0.060(2) -0.0020(15) 0.0140(17) 0.0041(14)
C15 0.0208(19) 0.0385(19) 0.063(2) -0.0020(17) 0.0110(17) 0.0079(15)
C16 0.036(2) 0.0418(19) 0.0308(19) -0.0011(15) -0.0010(16) 0.0186(16)
C17 0.048(2) 0.0249(17) 0.059(2) 0.0136(15) 0.025(2) 0.0086(16)
C18 0.035(2) 0.0291(17) 0.050(2) 0.0102(15) 0.0218(18) 0.0085(14)
 
 
#----------------------------------------------------------------------------#
#                   MOLECULAR GEOMETRY                                       #
#----------------------------------------------------------------------------#
 
_geom_special_details
;
 All esds (except the esd in the dihedral angle between two l.s. planes)
 are estimated using the full covariance matrix.  The cell esds are taken
 into account individually in the estimation of esds in distances, angles
 and torsion angles; correlations between esds in cell parameters are only
 used when they are defined by crystal symmetry.  An approximate (isotropic)
 treatment of cell esds is used for estimating esds involving l.s. planes.
;
loop_
    _geom_bond_atom_site_label_1
    _geom_bond_atom_site_label_2
    _geom_bond_distance
    _geom_bond_site_symmetry_2
    _geom_bond_publ_flag
Sn C13 2.171(2) . ?
Sn C7 2.172(3) . ?
Sn C1 2.173(2) . ?
Sn Cl 2.4609(7) . ?
Sn Cl 3.0398(7) 4_565 ?
Cl Sn 3.0398(7) 4_566 ?
C1 C2 1.524(4) . ?
C1 C6 1.528(4) . ?
C2 C3 1.534(4) . ?
C3 C4 1.518(4) . ?
C4 C5 1.523(4) . ?
C5 C6 1.531(4) . ?
C7 C8 1.520(4) . ?
C7 C12 1.522(4) . ?
C8 C9 1.531(4) . ?
C9 C10 1.514(4) . ?
C10 C11 1.513(4) . ?
C11 C12 1.533(4) . ?
C13 C18 1.522(4) . ?
C13 C14 1.523(4) . ?
C14 C15 1.534(4) . ?
C15 C16 1.523(4) . ?
C16 C17 1.519(4) . ?
C17 C18 1.538(4) . ?
 
loop_
    _geom_angle_atom_site_label_1
    _geom_angle_atom_site_label_2
    _geom_angle_atom_site_label_3
    _geom_angle
    _geom_angle_site_symmetry_1
    _geom_angle_site_symmetry_3
    _geom_angle_publ_flag
C13 Sn C7 116.32(10) . . ?
C13 Sn C1 122.40(10) . . ?
C7 Sn C1 115.62(10) . . ?
C13 Sn Cl 97.94(7) . . ?
C7 Sn Cl 96.15(7) . . ?
C1 Sn Cl 99.65(7) . . ?
C13 Sn Cl 82.55(7) . 4_565 ?
C7 Sn Cl 85.00(7) . 4_565 ?
C1 Sn Cl 78.79(7) . 4_565 ?
Cl Sn Cl 178.37(2) . 4_565 ?
Sn Cl Sn 171.11(3) . 4_566 ?
C2 C1 C6 110.5(2) . . ?
C2 C1 Sn 115.08(17) . . ?
C6 C1 Sn 112.47(18) . . ?
C1 C2 C3 110.7(2) . . ?
C4 C3 C2 111.2(2) . . ?
C3 C4 C5 110.9(2) . . ?
C4 C5 C6 111.3(2) . . ?
C1 C6 C5 111.4(2) . . ?
C8 C7 C12 110.6(2) . . ?
C8 C7 Sn 111.95(18) . . ?
C12 C7 Sn 111.63(18) . . ?
C7 C8 C9 111.5(2) . . ?
C10 C9 C8 111.2(3) . . ?
C11 C10 C9 110.8(3) . . ?
C10 C11 C12 111.7(3) . . ?
C7 C12 C11 111.4(2) . . ?
C18 C13 C14 111.6(2) . . ?
C18 C13 Sn 113.16(19) . . ?
C14 C13 Sn 111.91(17) . . ?
C13 C14 C15 111.6(2) . . ?
C16 C15 C14 111.0(3) . . ?
C17 C16 C15 110.3(2) . . ?
C16 C17 C18 111.0(3) . . ?
C13 C18 C17 110.6(3) . . ?
 
#===END

 
 
 
data_cy3sncl173
 
_audit_creation_date            2002-09-05T11:39:51-00:00
_audit_creation_method         'WinGX routine CIF_UPDATE'
_audit_conform_dict_name        cif_core.dic
_audit_conform_dict_version     2.2
_audit_conform_dict_location    ftp://ftp.iucr.org/pub/cif_core.dic
_publ_requested_category        FM
 
#----------------------------------------------------------------------------#
#                   CHEMICAL INFORMATION                                     #
#----------------------------------------------------------------------------#
 
_chemical_name_systematic
;
 ?
;
_chemical_name_common                   '[cy3SnCl] at 173K'
_chemical_formula_moiety                'C18 H33 Cl1 Sn1'
_chemical_formula_sum                   'C18 H33 Cl Sn'
_chemical_formula_weight                403.58
_chemical_compound_source               'synthesis as described'
 
#----------------------------------------------------------------------------#
#                   UNIT CELL INFORMATION                                    #
#----------------------------------------------------------------------------#
 
_symmetry_cell_setting                  monoclinic
_symmetry_space_group_name_H-M          P2(1)/c
_symmetry_Int_Tables_number             14
loop_
    _symmetry_equiv_pos_as_xyz
'x, y, z'
'-x, y+1/2, -z+1/2'
'-x, -y, -z'
'x, -y-1/2, z-1/2'
 
_cell_length_a                          10.7651(3)
_cell_length_b                          16.9704(4)
_cell_length_c                          11.0152(3)
_cell_angle_alpha                       90
_cell_angle_beta                        110.941(1)
_cell_angle_gamma                       90
_cell_volume                            1879.43(9)
_cell_formula_units_Z                   4
_cell_measurement_temperature           173(2)
_cell_measurement_reflns_used           20057
_cell_measurement_theta_min             3.705
_cell_measurement_theta_max             27.878
_cell_measurement_wavelength            0.71073
 
#----------------------------------------------------------------------------#
#                   CRYSTAL INFORMATION                                      #
#----------------------------------------------------------------------------#
 
_exptl_crystal_description              needle
_exptl_crystal_colour                   colourless
_exptl_crystal_size_max                 0.1
_exptl_crystal_size_mid                 0.1
_exptl_crystal_size_min                 0.1
_exptl_crystal_density_diffrn           1.426
_exptl_crystal_density_method           'not measured'
_exptl_crystal_F_000                    832
_exptl_special_details
;
 ?
;
 
#----------------------------------------------------------------------------#
#                   ABSORPTION CORRECTION                                    #
#----------------------------------------------------------------------------#
 
_exptl_absorpt_coefficient_mu           1.493
_exptl_absorpt_correction_type          multi-scan
_exptl_absorpt_process_details
;
        [c.f. r.h. blessing, acta cryst. (1995), a51, 33-38]
;
_exptl_absorpt_correction_T_min         0.8161
_exptl_absorpt_correction_T_max         0.8904
 
#----------------------------------------------------------------------------#
#                   DATA COLLECTION                                          #
#----------------------------------------------------------------------------#
 
_diffrn_ambient_temperature             173(2)
_diffrn_radiation_wavelength            0.71073
_diffrn_radiation_type                  MoK\a
_diffrn_radiation_monochromator         graphite
_diffrn_radiation_probe                 x-ray
_diffrn_measurement_device              '95mm CCD camera on \k-goniostat'
_diffrn_measurement_device_type         KappaCCD
_diffrn_measurement_method              CCD
_diffrn_reflns_av_R_equivalents         0.0511
_diffrn_reflns_av_unetI/netI            0.0482
_diffrn_reflns_number                   16982
_diffrn_reflns_limit_h_min              -14
_diffrn_reflns_limit_h_max              12
_diffrn_reflns_limit_k_min              -21
_diffrn_reflns_limit_k_max              22
_diffrn_reflns_limit_l_min              -11
_diffrn_reflns_limit_l_max              14
_diffrn_reflns_theta_min                3.75
_diffrn_reflns_theta_max                27.89
_diffrn_reflns_theta_full               27.89
_diffrn_measured_fraction_theta_full
                                        0.994
_diffrn_measured_fraction_theta_max
                                        0.994
_reflns_number_total                    4474
_reflns_number_gt                       3199
_reflns_threshold_expression            >2sigma(I)
 
#----------------------------------------------------------------------------#
#                   COMPUTER PROGRAMS USED                                   #
#----------------------------------------------------------------------------#
 
_computing_data_collection              'Collect (Nonius BV, 1997-2000)'
_computing_cell_refinement
                                       'HKL Scalepack (Otwinowski & Minor 1997)'
_computing_data_reduction
                             'HKL Denzo and Scalepack (Otwinowski & Minor 1997)'
_computing_structure_solution           'SHELXS-97 (Sheldrick, 1997)'
_computing_structure_refinement         'SHELXL-97 (Sheldrick, 1997)'
_computing_molecular_graphics           'Ortep-3 for Windows (Farrugia, 1997)'
_computing_publication_material
                                   'WinGX publication routines (Farrugia, 1999)'
 
#----------------------------------------------------------------------------#
#                   REFINEMENT INFORMATION                                   #
#----------------------------------------------------------------------------#
 
_refine_special_details
;
 Refinement of F^2^ against ALL reflections.  The weighted R-factor wR and
 goodness of fit S are based on F^2^, conventional R-factors R are based
 on F, with F set to zero for negative F^2^. The threshold expression of
 F^2^ > 2sigma(F^2^) is used only for calculating R-factors(gt) etc. and is
 not relevant to the choice of reflections for refinement.  R-factors based
 on F^2^ are statistically about twice as large as those based on F, and R-
 factors based on ALL data will be even larger.
;
_refine_ls_structure_factor_coef        Fsqd
_refine_ls_matrix_type                  full
_refine_ls_weighting_scheme             calc
_refine_ls_weighting_details
         'calc w=1/[\s^2^(Fo^2^)+(0.0225P)^2^+1.3479P] where P=(Fo^2^+2Fc^2^)/3'
_atom_sites_solution_primary            direct
_atom_sites_solution_secondary          difmap
_atom_sites_solution_hydrogens          geom
_refine_ls_hydrogen_treatment           riding
_refine_ls_extinction_method            none
_refine_ls_number_reflns                4474
_refine_ls_number_parameters            181
_refine_ls_number_restraints            0
_refine_ls_R_factor_all                 0.0577
_refine_ls_R_factor_gt                  0.033
_refine_ls_wR_factor_ref                0.0712
_refine_ls_wR_factor_gt                 0.0644
_refine_ls_goodness_of_fit_ref          1.027
_refine_ls_restrained_S_all             1.027
_refine_ls_shift/su_max                 0.009
_refine_ls_shift/su_mean                0.001
_refine_diff_density_max                0.562
_refine_diff_density_min                -0.653
_refine_diff_density_rms                0.095
 
#----------------------------------------------------------------------------#
#                   ATOMIC TYPES, COORDINATES AND THERMAL PARAMETERS         #
#----------------------------------------------------------------------------#
 
loop_
    _atom_type_symbol
    _atom_type_description
    _atom_type_scat_dispersion_real
    _atom_type_scat_dispersion_imag
    _atom_type_scat_source
C C 0.0033 0.0016 'International Tables Vol C Tables 4.2.6.8 and 6.1.1.4'
H H 0 0 'International Tables Vol C Tables 4.2.6.8 and 6.1.1.4'
Cl Cl 0.1484 0.1585 'International Tables Vol C Tables 4.2.6.8 and 6.1.1.4'
Sn Sn -0.6537 1.4246 'International Tables Vol C Tables 4.2.6.8 and 6.1.1.4'
 
loop_
    _atom_site_label
    _atom_site_type_symbol
    _atom_site_fract_x
    _atom_site_fract_y
    _atom_site_fract_z
    _atom_site_U_iso_or_equiv
    _atom_site_adp_type
    _atom_site_occupancy
    _atom_site_symmetry_multiplicity
    _atom_site_calc_flag
    _atom_site_refinement_flags
    _atom_site_disorder_assembly
    _atom_site_disorder_group
Sn Sn 0.023710(17) 0.245796(11) 0.849100(17) 0.02089(7) Uani 1 1 d . . .
Cl Cl 0.02619(9) 0.23453(5) 1.07222(7) 0.0385(2) Uani 1 1 d . . .
C1 C 0.1222(3) 0.35870(15) 0.8617(3) 0.0244(6) Uani 1 1 d . . .
H1 H 0.0673 0.3891 0.7831 0.029 Uiso 1 1 calc R . .
C2 C 0.2618(3) 0.35500(17) 0.8569(3) 0.0322(7) Uani 1 1 d . . .
H2A H 0.2595 0.3257 0.7784 0.039 Uiso 1 1 calc R . .
H2B H 0.3214 0.3264 0.9341 0.039 Uiso 1 1 calc R . .
C3 C 0.3163(4) 0.43810(19) 0.8538(4) 0.0410(8) Uani 1 1 d . . .
H3A H 0.408 0.4343 0.8537 0.049 Uiso 1 1 calc R . .
H3B H 0.2608 0.4649 0.7727 0.049 Uiso 1 1 calc R . .
C4 C 0.3171(3) 0.48656(19) 0.9692(3) 0.0413(9) Uani 1 1 d . . .
H4A H 0.3474 0.5407 0.9612 0.05 Uiso 1 1 calc R . .
H4B H 0.3802 0.4631 1.05 0.05 Uiso 1 1 calc R . .
C5 C 0.1789(4) 0.48966(18) 0.9772(3) 0.0414(8) Uani 1 1 d . . .
H5A H 0.1185 0.5192 0.9015 0.05 Uiso 1 1 calc R . .
H5B H 0.1833 0.5182 1.057 0.05 Uiso 1 1 calc R . .
C6 C 0.1226(3) 0.40714(17) 0.9789(3) 0.0353(8) Uani 1 1 d . . .
H6A H 0.0306 0.4115 0.9781 0.042 Uiso 1 1 calc R . .
H6B H 0.1769 0.3798 1.0599 0.042 Uiso 1 1 calc R . .
C7 C -0.1901(3) 0.24779(16) 0.7538(3) 0.0270(6) Uani 1 1 d . . .
H7 H -0.2089 0.2542 0.6586 0.032 Uiso 1 1 calc R . .
C8 C -0.2538(3) 0.3166(2) 0.7957(4) 0.0497(10) Uani 1 1 d . . .
H8A H -0.216 0.3662 0.7766 0.06 Uiso 1 1 calc R . .
H8B H -0.2322 0.3138 0.8908 0.06 Uiso 1 1 calc R . .
C9 C -0.4048(4) 0.3181(2) 0.7276(5) 0.0646(12) Uani 1 1 d . . .
H9A H -0.4422 0.3618 0.7631 0.078 Uiso 1 1 calc R . .
H9B H -0.4267 0.328 0.6336 0.078 Uiso 1 1 calc R . .
C10 C -0.4671(4) 0.2420(2) 0.7451(4) 0.0568(11) Uani 1 1 d . . .
H10A H -0.4556 0.2357 0.8379 0.068 Uiso 1 1 calc R . .
H10B H -0.5637 0.2437 0.694 0.068 Uiso 1 1 calc R . .
C11 C -0.4066(4) 0.1730(2) 0.7027(5) 0.0694(14) Uani 1 1 d . . .
H11A H -0.4288 0.1756 0.6074 0.083 Uiso 1 1 calc R . .
H11B H -0.4449 0.1238 0.7225 0.083 Uiso 1 1 calc R . .
C12 C -0.2546(3) 0.1713(2) 0.7708(4) 0.0548(11) Uani 1 1 d . . .
H12A H -0.2326 0.1612 0.8647 0.066 Uiso 1 1 calc R . .
H12B H -0.2177 0.1274 0.735 0.066 Uiso 1 1 calc R . .
C13 C 0.1222(3) 0.13557(16) 0.8420(3) 0.0251(6) Uani 1 1 d . . .
H13 H 0.0927 0.1203 0.7482 0.03 Uiso 1 1 calc R . .
C14 C 0.2715(3) 0.14381(19) 0.8885(4) 0.0512(10) Uani 1 1 d . . .
H14A H 0.3048 0.1616 0.9802 0.061 Uiso 1 1 calc R . .
H14B H 0.2949 0.1846 0.836 0.061 Uiso 1 1 calc R . .
C15 C 0.3398(4) 0.0660(2) 0.8782(5) 0.0624(12) Uani 1 1 d . . .
H15A H 0.3149 0.0512 0.7855 0.075 Uiso 1 1 calc R . .
H15B H 0.4375 0.0729 0.9151 0.075 Uiso 1 1 calc R . .
C16 C 0.2991(4) 0.0001(2) 0.9511(4) 0.0518(10) Uani 1 1 d . . .
H16A H 0.341 -0.0501 0.9403 0.062 Uiso 1 1 calc R . .
H16B H 0.3303 0.0127 1.045 0.062 Uiso 1 1 calc R . .
C17 C 0.1500(4) -0.00873(19) 0.8989(4) 0.0479(9) Uani 1 1 d . . .
H17A H 0.1243 -0.051 0.9472 0.058 Uiso 1 1 calc R . .
H17B H 0.12 -0.0243 0.8062 0.058 Uiso 1 1 calc R . .
C18 C 0.0810(4) 0.06824(18) 0.9115(4) 0.0430(9) Uani 1 1 d . . .
H18A H -0.0166 0.0612 0.8735 0.052 Uiso 1 1 calc R . .
H18B H 0.105 0.0816 1.0046 0.052 Uiso 1 1 calc R . .
 
loop_
    _atom_site_aniso_label
    _atom_site_aniso_U_11
    _atom_site_aniso_U_22
    _atom_site_aniso_U_33
    _atom_site_aniso_U_23
    _atom_site_aniso_U_13
    _atom_site_aniso_U_12
Sn 0.01731(11) 0.02645(12) 0.01945(10) -0.00087(8) 0.00723(7) 0.00076(9)
Cl 0.0535(5) 0.0448(5) 0.0216(3) -0.0014(3) 0.0189(4) -0.0015(4)
C1 0.0236(17) 0.0232(14) 0.0280(16) -0.0020(11) 0.0112(13) 0.0013(12)
C2 0.0280(19) 0.0297(16) 0.0439(19) -0.0075(14) 0.0190(15) -0.0019(13)
C3 0.032(2) 0.0406(19) 0.056(2) -0.0058(16) 0.0236(17) -0.0092(15)
C4 0.032(2) 0.0296(18) 0.055(2) -0.0025(15) 0.0072(17) -0.0067(14)
C5 0.042(2) 0.0343(18) 0.047(2) -0.0120(15) 0.0144(17) -0.0013(16)
C6 0.034(2) 0.0362(18) 0.0381(19) -0.0105(14) 0.0163(16) -0.0004(15)
C7 0.0175(14) 0.0378(17) 0.0245(14) 0.0024(13) 0.0062(11) 0.0021(13)
C8 0.027(2) 0.038(2) 0.080(3) -0.0140(18) 0.0144(19) 0.0014(15)
C9 0.029(2) 0.050(2) 0.112(4) -0.012(2) 0.022(2) 0.0064(18)
C10 0.0247(18) 0.084(3) 0.065(3) 0.005(2) 0.0202(18) -0.0004(19)
C11 0.024(2) 0.050(2) 0.119(4) -0.013(2) 0.008(2) -0.0079(18)
C12 0.027(2) 0.038(2) 0.092(3) -0.0096(19) 0.012(2) -0.0053(16)
C13 0.0234(17) 0.0291(15) 0.0234(15) 0.0008(11) 0.0090(13) 0.0031(12)
C14 0.026(2) 0.0346(19) 0.090(3) -0.0025(18) 0.017(2) 0.0067(15)
C15 0.028(2) 0.045(2) 0.111(4) -0.005(2) 0.021(2) 0.0124(17)
C16 0.048(3) 0.045(2) 0.049(2) -0.0006(17) 0.0005(19) 0.0233(18)
C17 0.050(3) 0.0301(18) 0.067(3) 0.0123(17) 0.026(2) 0.0069(16)
C18 0.040(2) 0.0324(18) 0.064(2) 0.0120(16) 0.0275(19) 0.0083(15)
 
 
#----------------------------------------------------------------------------#
#                   MOLECULAR GEOMETRY                                       #
#----------------------------------------------------------------------------#
 
_geom_special_details
;
 All esds (except the esd in the dihedral angle between two l.s. planes)
 are estimated using the full covariance matrix.  The cell esds are taken
 into account individually in the estimation of esds in distances, angles
 and torsion angles; correlations between esds in cell parameters are only
 used when they are defined by crystal symmetry.  An approximate (isotropic)
 treatment of cell esds is used for estimating esds involving l.s. planes.
;
loop_
    _geom_bond_atom_site_label_1
    _geom_bond_atom_site_label_2
    _geom_bond_distance
    _geom_bond_site_symmetry_2
    _geom_bond_publ_flag
Sn C7 2.161(3) . ?
Sn C13 2.166(3) . ?
Sn C1 2.170(3) . ?
Sn Cl 2.4558(7) . ?
Sn Cl 3.0777(8) 4_565 ?
Cl Sn 3.0777(8) 4_566 ?
C1 C2 1.523(4) . ?
C1 C6 1.529(4) . ?
C2 C3 1.532(4) . ?
C3 C4 1.511(4) . ?
C4 C5 1.522(5) . ?
C5 C6 1.528(4) . ?
C7 C8 1.508(4) . ?
C7 C12 1.516(4) . ?
C8 C9 1.528(5) . ?
C9 C10 1.499(5) . ?
C10 C11 1.494(5) . ?
C11 C12 1.538(5) . ?
C13 C14 1.508(4) . ?
C13 C18 1.527(4) . ?
C14 C15 1.536(5) . ?
C15 C16 1.529(5) . ?
C16 C17 1.507(5) . ?
C17 C18 1.533(4) . ?
 
loop_
    _geom_angle_atom_site_label_1
    _geom_angle_atom_site_label_2
    _geom_angle_atom_site_label_3
    _geom_angle
    _geom_angle_site_symmetry_1
    _geom_angle_site_symmetry_3
    _geom_angle_publ_flag
C7 Sn C13 116.49(11) . . ?
C7 Sn C1 115.37(11) . . ?
C13 Sn C1 122.03(11) . . ?
C7 Sn Cl 96.68(8) . . ?
C13 Sn Cl 97.98(8) . . ?
C1 Sn Cl 100.05(8) . . ?
C7 Sn Cl 84.36(8) . 4_565 ?
C13 Sn Cl 83.10(8) . 4_565 ?
C1 Sn Cl 77.90(8) . 4_565 ?
Cl Sn Cl 177.95(2) . 4_565 ?
Sn Cl Sn 169.25(3) . 4_566 ?
C2 C1 C6 110.3(2) . . ?
C2 C1 Sn 115.27(18) . . ?
C6 C1 Sn 112.47(19) . . ?
C1 C2 C3 110.7(2) . . ?
C4 C3 C2 111.7(3) . . ?
C3 C4 C5 110.8(3) . . ?
C4 C5 C6 111.6(3) . . ?
C5 C6 C1 111.3(3) . . ?
C8 C7 C12 110.3(3) . . ?
C8 C7 Sn 112.7(2) . . ?
C12 C7 Sn 112.4(2) . . ?
C7 C8 C9 112.5(3) . . ?
C10 C9 C8 111.6(3) . . ?
C11 C10 C9 111.7(3) . . ?
C10 C11 C12 111.7(3) . . ?
C7 C12 C11 112.2(3) . . ?
C14 C13 C18 111.3(3) . . ?
C14 C13 Sn 112.6(2) . . ?
C18 C13 Sn 113.2(2) . . ?
C13 C14 C15 112.0(3) . . ?
C16 C15 C14 110.8(3) . . ?
C17 C16 C15 109.8(3) . . ?
C16 C17 C18 111.4(3) . . ?
C13 C18 C17 110.8(3) . . ?
 
#===END

 
 
data_cy3sncl198
 
_audit_creation_date            2002-09-06T11:40:25-00:00
_audit_creation_method         'WinGX routine CIF_UPDATE'
_audit_conform_dict_name        cif_core.dic
_audit_conform_dict_version     2.2
_audit_conform_dict_location    ftp://ftp.iucr.org/pub/cif_core.dic
_publ_requested_category        FM
 
#----------------------------------------------------------------------------#
#                   CHEMICAL INFORMATION                                     #
#----------------------------------------------------------------------------#
 
_chemical_name_systematic
;
 ?
;
_chemical_name_common                   '[cy3SnCl]  at 198K '
_chemical_formula_moiety                'C18 H33 Cl1 Sn1'
_chemical_formula_sum                   'C18 H33 Cl Sn'
_chemical_formula_weight                403.58
_chemical_compound_source               'synthesis as described'
 
#----------------------------------------------------------------------------#
#                   UNIT CELL INFORMATION                                    #
#----------------------------------------------------------------------------#
 
_symmetry_cell_setting                  monoclinic
_symmetry_space_group_name_H-M          P2(1)/c
_symmetry_Int_Tables_number             14
loop_
    _symmetry_equiv_pos_as_xyz
'x, y, z'
'-x, y+1/2, -z+1/2'
'-x, -y, -z'
'x, -y-1/2, z-1/2'
 
_cell_length_a                          10.6669(3)
_cell_length_b                          16.9776(4)
_cell_length_c                          11.1303(3)
_cell_angle_alpha                       90
_cell_angle_beta                        109.259(1)
_cell_angle_gamma                       90
_cell_volume                            1902.88(9)
_cell_formula_units_Z                   4
_cell_measurement_temperature           198(2)
_cell_measurement_reflns_used           22304
_cell_measurement_theta_min             3.705
_cell_measurement_theta_max             27.878
_cell_measurement_wavelength            0.71073
 
#----------------------------------------------------------------------------#
#                   CRYSTAL INFORMATION                                      #
#----------------------------------------------------------------------------#
 
_exptl_crystal_description              needle
_exptl_crystal_colour                   colourless
_exptl_crystal_size_max                 0.1
_exptl_crystal_size_mid                 0.1
_exptl_crystal_size_min                 0.1
_exptl_crystal_density_diffrn           1.409
_exptl_crystal_density_method           'not measured'
_exptl_crystal_F_000                    832
_exptl_special_details
;
 ?
;
 
#----------------------------------------------------------------------------#
#                   ABSORPTION CORRECTION                                    #
#----------------------------------------------------------------------------#
 
_exptl_absorpt_coefficient_mu           1.475
_exptl_absorpt_correction_type          multi-scan
_exptl_absorpt_process_details
;
        [c.f. r.h. blessing, acta cryst. (1995), a51, 33-38]
;
_exptl_absorpt_correction_T_min         0.816
_exptl_absorpt_correction_T_max         0.8912
 
#----------------------------------------------------------------------------#
#                   DATA COLLECTION                                          #
#----------------------------------------------------------------------------#
 
_diffrn_ambient_temperature             198(2)
_diffrn_radiation_wavelength            0.71073
_diffrn_radiation_type                  MoK\a
_diffrn_radiation_monochromator         graphite
_diffrn_radiation_probe                 x-ray
_diffrn_measurement_device              '95mm CCD camera on \k-goniostat'
_diffrn_measurement_device_type         KappaCCD
_diffrn_measurement_method              CCD
_diffrn_reflns_av_R_equivalents         0.0524
_diffrn_reflns_av_unetI/netI            0.0525
_diffrn_reflns_number                   17184
_diffrn_reflns_limit_h_min              -14
_diffrn_reflns_limit_h_max              12
_diffrn_reflns_limit_k_min              -21
_diffrn_reflns_limit_k_max              22
_diffrn_reflns_limit_l_min              -11
_diffrn_reflns_limit_l_max              14
_diffrn_reflns_theta_min                3.74
_diffrn_reflns_theta_max                27.89
_diffrn_reflns_theta_full               27.89
_diffrn_measured_fraction_theta_full
                                        0.993
_diffrn_measured_fraction_theta_max
                                        0.993
_reflns_number_total                    4514
_reflns_number_gt                       3230
_reflns_threshold_expression            >2sigma(I)
 
#----------------------------------------------------------------------------#
#                   COMPUTER PROGRAMS USED                                   #
#----------------------------------------------------------------------------#
 
_computing_data_collection              'Collect (Nonius BV, 1997-2000)'
_computing_cell_refinement
                                       'HKL Scalepack (Otwinowski & Minor 1997)'
_computing_data_reduction
                             'HKL Denzo and Scalepack (Otwinowski & Minor 1997)'
_computing_structure_solution           'SHELXS-97 (Sheldrick, 1997)'
_computing_structure_refinement         'SHELXL-97 (Sheldrick, 1997)'
_computing_molecular_graphics           'Ortep-3 for Windows (Farrugia, 1997)'
_computing_publication_material
                                   'WinGX publication routines (Farrugia, 1999)'
 
#----------------------------------------------------------------------------#
#                   REFINEMENT INFORMATION                                   #
#----------------------------------------------------------------------------#
 
_refine_special_details
;
 Refinement of F^2^ against ALL reflections.  The weighted R-factor wR and
 goodness of fit S are based on F^2^, conventional R-factors R are based
 on F, with F set to zero for negative F^2^. The threshold expression of
 F^2^ > 2sigma(F^2^) is used only for calculating R-factors(gt) etc. and is
 not relevant to the choice of reflections for refinement.  R-factors based
 on F^2^ are statistically about twice as large as those based on F, and R-
 factors based on ALL data will be even larger.
;
_refine_ls_structure_factor_coef        Fsqd
_refine_ls_matrix_type                  full
_refine_ls_weighting_scheme             calc
_refine_ls_weighting_details
         'calc w=1/[\s^2^(Fo^2^)+(0.0312P)^2^+2.6271P] where P=(Fo^2^+2Fc^2^)/3'
_atom_sites_solution_primary            direct
_atom_sites_solution_secondary          difmap
_atom_sites_solution_hydrogens          geom
_refine_ls_hydrogen_treatment           riding
_refine_ls_extinction_method            none
_refine_ls_number_reflns                4514
_refine_ls_number_parameters            181
_refine_ls_number_restraints            0
_refine_ls_R_factor_all                 0.0698
_refine_ls_R_factor_gt                  0.0403
_refine_ls_wR_factor_ref                0.0912
_refine_ls_wR_factor_gt                 0.0813
_refine_ls_goodness_of_fit_ref          1.03
_refine_ls_restrained_S_all             1.03
_refine_ls_shift/su_max                 0.001
_refine_ls_shift/su_mean                0
_refine_diff_density_max                0.807
_refine_diff_density_min                -0.629
_refine_diff_density_rms                0.1
 
#----------------------------------------------------------------------------#
#                   ATOMIC TYPES, COORDINATES AND THERMAL PARAMETERS         #
#----------------------------------------------------------------------------#
 
loop_
    _atom_type_symbol
    _atom_type_description
    _atom_type_scat_dispersion_real
    _atom_type_scat_dispersion_imag
    _atom_type_scat_source
C C 0.0033 0.0016 'International Tables Vol C Tables 4.2.6.8 and 6.1.1.4'
H H 0 0 'International Tables Vol C Tables 4.2.6.8 and 6.1.1.4'
Cl Cl 0.1484 0.1585 'International Tables Vol C Tables 4.2.6.8 and 6.1.1.4'
Sn Sn -0.6537 1.4246 'International Tables Vol C Tables 4.2.6.8 and 6.1.1.4'
 
loop_
    _atom_site_label
    _atom_site_type_symbol
    _atom_site_fract_x
    _atom_site_fract_y
    _atom_site_fract_z
    _atom_site_U_iso_or_equiv
    _atom_site_adp_type
    _atom_site_occupancy
    _atom_site_symmetry_multiplicity
    _atom_site_calc_flag
    _atom_site_refinement_flags
    _atom_site_disorder_assembly
    _atom_site_disorder_group
Sn Sn 0.02789(2) 0.244039(14) 0.86749(2) 0.02807(9) Uani 1 1 d . . .
Cl Cl 0.02749(12) 0.22998(7) 1.08589(10) 0.0501(3) Uani 1 1 d . . .
C1 C 0.1262(4) 0.3568(2) 0.8785(4) 0.0338(9) Uani 1 1 d . . .
H1 H 0.0704 0.3875 0.8031 0.041 Uiso 1 1 calc R . .
C2 C 0.2634(4) 0.3538(2) 0.8668(4) 0.0440(10) Uani 1 1 d . . .
H2A H 0.2596 0.3248 0.7885 0.053 Uiso 1 1 calc R . .
H2B H 0.3242 0.3251 0.9405 0.053 Uiso 1 1 calc R . .
C3 C 0.3175(5) 0.4368(3) 0.8616(5) 0.0550(12) Uani 1 1 d . . .
H3A H 0.409 0.4331 0.8584 0.066 Uiso 1 1 calc R . .
H3B H 0.2618 0.4635 0.7831 0.066 Uiso 1 1 calc R . .
C4 C 0.3185(5) 0.4849(3) 0.9760(5) 0.0595(13) Uani 1 1 d . . .
H4A H 0.3831 0.4619 1.0536 0.071 Uiso 1 1 calc R . .
H4B H 0.3473 0.5393 0.9666 0.071 Uiso 1 1 calc R . .
C5 C 0.1828(5) 0.4870(3) 0.9906(5) 0.0612(14) Uani 1 1 d . . .
H5A H 0.1212 0.5167 0.9187 0.073 Uiso 1 1 calc R . .
H5B H 0.1885 0.5151 1.0702 0.073 Uiso 1 1 calc R . .
C6 C 0.1277(5) 0.4048(3) 0.9943(4) 0.0523(12) Uani 1 1 d . . .
H6A H 0.0362 0.4089 0.9973 0.063 Uiso 1 1 calc R . .
H6B H 0.1827 0.3775 1.0725 0.063 Uiso 1 1 calc R . .
C7 C -0.1857(4) 0.2462(3) 0.7731(4) 0.0456(10) Uani 1 1 d . . .
H7 H -0.1998 0.2574 0.6814 0.055 Uiso 1 1 calc R . .
C8 C -0.2501(5) 0.3095(4) 0.8174(9) 0.120(3) Uani 1 1 d . . .
H8A H -0.2111 0.3603 0.8042 0.143 Uiso 1 1 calc R . .
H8B H -0.2328 0.3031 0.9099 0.143 Uiso 1 1 calc R . .
C9 C -0.4010(6) 0.3117(4) 0.7486(10) 0.148(4) Uani 1 1 d . . .
H9A H -0.4405 0.3524 0.7888 0.177 Uiso 1 1 calc R . .
H9B H -0.4181 0.3273 0.6589 0.177 Uiso 1 1 calc R . .
C10 C -0.4655(5) 0.2376(4) 0.7511(6) 0.0763(18) Uani 1 1 d . . .
H10A H -0.4642 0.2269 0.839 0.092 Uiso 1 1 calc R . .
H10B H -0.5595 0.241 0.6958 0.092 Uiso 1 1 calc R . .
C11 C -0.4024(5) 0.1742(4) 0.7091(10) 0.151(4) Uani 1 1 d . . .
H11A H -0.4204 0.1795 0.6163 0.181 Uiso 1 1 calc R . .
H11B H -0.4421 0.1239 0.7237 0.181 Uiso 1 1 calc R . .
C12 C -0.2519(5) 0.1707(4) 0.7761(10) 0.140(4) Uani 1 1 d . . .
H12A H -0.2338 0.1549 0.8658 0.169 Uiso 1 1 calc R . .
H12B H -0.2137 0.1299 0.7348 0.169 Uiso 1 1 calc R . .
C13 C 0.1317(4) 0.1364(2) 0.8576(4) 0.0383(9) Uani 1 1 d . . .
H13 H 0.1257 0.1296 0.7666 0.046 Uiso 1 1 calc R . .
C14 C 0.2751(5) 0.1400(3) 0.9330(9) 0.120(3) Uani 1 1 d . . .
H14A H 0.2854 0.1505 1.0233 0.144 Uiso 1 1 calc R . .
H14B H 0.3167 0.1841 0.9018 0.144 Uiso 1 1 calc R . .
C15 C 0.3470(6) 0.0629(3) 0.9238(11) 0.152(4) Uani 1 1 d . . .
H15A H 0.3473 0.0563 0.8355 0.183 Uiso 1 1 calc R . .
H15B H 0.4405 0.0663 0.9804 0.183 Uiso 1 1 calc R . .
C16 C 0.2836(5) -0.0072(3) 0.9598(6) 0.0705(16) Uani 1 1 d . . .
H16A H 0.3294 -0.0556 0.9469 0.085 Uiso 1 1 calc R . .
H16B H 0.2922 -0.004 1.051 0.085 Uiso 1 1 calc R . .
C17 C 0.1427(5) -0.0113(3) 0.8823(6) 0.0641(14) Uani 1 1 d . . .
H17A H 0.1008 -0.0564 0.9107 0.077 Uiso 1 1 calc R . .
H17B H 0.1347 -0.0202 0.7922 0.077 Uiso 1 1 calc R . .
C18 C 0.0692(5) 0.0648(3) 0.8929(6) 0.0620(14) Uani 1 1 d . . .
H18A H -0.0242 0.0609 0.8363 0.074 Uiso 1 1 calc R . .
H18B H 0.069 0.0705 0.9813 0.074 Uiso 1 1 calc R . .
 
loop_
    _atom_site_aniso_label
    _atom_site_aniso_U_11
    _atom_site_aniso_U_22
    _atom_site_aniso_U_33
    _atom_site_aniso_U_23
    _atom_site_aniso_U_13
    _atom_site_aniso_U_12
Sn 0.02396(14) 0.03417(16) 0.02650(13) -0.00002(11) 0.00887(10) 0.00068(11)
Cl 0.0710(8) 0.0542(6) 0.0303(5) 0.0018(4) 0.0235(5) 0.0018(5)
C1 0.030(2) 0.034(2) 0.038(2) -0.0005(16) 0.0137(18) 0.0008(16)
C2 0.032(2) 0.045(2) 0.058(3) -0.005(2) 0.020(2) -0.0035(18)
C3 0.043(3) 0.052(3) 0.076(3) -0.003(2) 0.027(3) -0.011(2)
C4 0.047(3) 0.049(3) 0.074(4) -0.009(2) 0.008(3) -0.012(2)
C5 0.074(4) 0.045(3) 0.074(4) -0.020(2) 0.036(3) -0.009(2)
C6 0.060(3) 0.049(3) 0.055(3) -0.015(2) 0.029(2) -0.006(2)
C7 0.027(2) 0.075(3) 0.034(2) 0.009(2) 0.0102(16) 0.001(2)
C8 0.034(3) 0.078(4) 0.220(9) -0.063(5) 0.005(4) 0.011(3)
C9 0.031(3) 0.082(5) 0.302(12) -0.050(6) 0.018(5) 0.014(3)
C10 0.028(2) 0.115(5) 0.088(4) 0.016(4) 0.022(3) 0.003(3)
C11 0.028(3) 0.094(5) 0.287(12) -0.075(6) -0.005(5) -0.009(3)
C12 0.026(3) 0.063(4) 0.293(12) -0.056(5) 0.000(5) -0.005(3)
C13 0.045(3) 0.038(2) 0.037(2) 0.0047(17) 0.020(2) 0.0103(18)
C14 0.032(3) 0.037(3) 0.267(10) -0.023(4) 0.016(4) 0.005(2)
C15 0.041(4) 0.041(3) 0.359(14) -0.013(5) 0.044(6) 0.009(3)
C16 0.062(4) 0.047(3) 0.085(4) 0.001(3) 0.000(3) 0.021(3)
C17 0.055(3) 0.038(3) 0.094(4) -0.003(2) 0.019(3) -0.001(2)
C18 0.043(3) 0.039(3) 0.104(4) 0.001(3) 0.025(3) 0.000(2)
 
 
#----------------------------------------------------------------------------#
#                   MOLECULAR GEOMETRY                                       #
#----------------------------------------------------------------------------#
 
_geom_special_details
;
 All esds (except the esd in the dihedral angle between two l.s. planes)
 are estimated using the full covariance matrix.  The cell esds are taken
 into account individually in the estimation of esds in distances, angles
 and torsion angles; correlations between esds in cell parameters are only
 used when they are defined by crystal symmetry.  An approximate (isotropic)
 treatment of cell esds is used for estimating esds involving l.s. planes.
;
loop_
    _geom_bond_atom_site_label_1
    _geom_bond_atom_site_label_2
    _geom_bond_distance
    _geom_bond_site_symmetry_2
    _geom_bond_publ_flag
Sn C13 2.158(4) . ?
Sn C1 2.167(4) . ?
Sn C7 2.172(4) . ?
Sn Cl 2.4440(11) . ?
Sn Cl 3.1638(11) 4_565 ?
Cl Sn 3.1638(11) 4_566 ?
C1 C2 1.513(5) . ?
C1 C6 1.520(5) . ?
C2 C3 1.530(6) . ?
C3 C4 1.510(7) . ?
C4 C5 1.509(7) . ?
C5 C6 1.519(6) . ?
C7 C8 1.447(7) . ?
C7 C12 1.469(7) . ?
C8 C9 1.537(8) . ?
C9 C10 1.439(8) . ?
C10 C11 1.429(8) . ?
C11 C12 1.532(8) . ?
C13 C14 1.484(7) . ?
C13 C18 1.500(6) . ?
C14 C15 1.538(7) . ?
C15 C16 1.488(8) . ?
C16 C17 1.468(7) . ?
C17 C18 1.535(6) . ?
 
loop_
    _geom_angle_atom_site_label_1
    _geom_angle_atom_site_label_2
    _geom_angle_atom_site_label_3
    _geom_angle
    _geom_angle_site_symmetry_1
    _geom_angle_site_symmetry_3
    _geom_angle_publ_flag
C13 Sn C1 120.29(15) . . ?
C13 Sn C7 117.61(16) . . ?
C1 Sn C7 115.03(15) . . ?
C13 Sn Cl 97.90(11) . . ?
C1 Sn Cl 100.92(11) . . ?
C7 Sn Cl 97.88(11) . . ?
C13 Sn Cl 84.29(11) . 4_565 ?
C1 Sn Cl 77.02(11) . 4_565 ?
C7 Sn Cl 81.96(11) . 4_565 ?
Cl Sn Cl 177.584(13) . 4_565 ?
Sn Cl Sn 166.38(5) . 4_566 ?
C2 C1 C6 110.6(3) . . ?
C2 C1 Sn 115.4(3) . . ?
C6 C1 Sn 113.0(3) . . ?
C1 C2 C3 111.1(3) . . ?
C4 C3 C2 111.3(4) . . ?
C5 C4 C3 111.3(4) . . ?
C4 C5 C6 112.0(4) . . ?
C5 C6 C1 111.4(4) . . ?
C8 C7 C12 110.7(5) . . ?
C8 C7 Sn 112.9(3) . . ?
C12 C7 Sn 114.2(3) . . ?
C7 C8 C9 112.7(5) . . ?
C10 C9 C8 113.4(6) . . ?
C11 C10 C9 111.9(6) . . ?
C10 C11 C12 113.6(6) . . ?
C7 C12 C11 113.0(6) . . ?
C14 C13 C18 110.4(4) . . ?
C14 C13 Sn 112.7(3) . . ?
C18 C13 Sn 113.2(3) . . ?
C13 C14 C15 111.8(5) . . ?
C16 C15 C14 112.5(6) . . ?
C17 C16 C15 110.3(5) . . ?
C16 C17 C18 111.5(4) . . ?
C13 C18 C17 112.3(4) . . ?
 
#===END

 
 
 
data_cy3sncl223
 
_audit_creation_date            2002-09-05T16:58:56-00:00
_audit_creation_method         'WinGX routine CIF_UPDATE'
_audit_conform_dict_name        cif_core.dic
_audit_conform_dict_version     2.2
_audit_conform_dict_location    ftp://ftp.iucr.org/pub/cif_core.dic
_publ_requested_category        FM
 
#----------------------------------------------------------------------------#
#                   CHEMICAL INFORMATION                                     #
#----------------------------------------------------------------------------#
 
_chemical_name_systematic
;
 ?
;
_chemical_name_common                   '[cy3SnCl] at 223K'
_chemical_formula_moiety                'C18 H33 Cl1 Sn1'
_chemical_formula_sum                   'C18 H33 Cl Sn'
_chemical_formula_weight                403.58
_chemical_compound_source               'synthesis as described'
 
#----------------------------------------------------------------------------#
#                   UNIT CELL INFORMATION                                    #
#----------------------------------------------------------------------------#
 
_symmetry_cell_setting                  monoclinic
_symmetry_space_group_name_H-M          P2(1)/c
_symmetry_Int_Tables_number             14
loop_
    _symmetry_equiv_pos_as_xyz
'x, y, z'
'-x, y+1/2, -z+1/2'
'-x, -y, -z'
'x, -y-1/2, z-1/2'
 
_cell_length_a                          10.6523(3)
_cell_length_b                          17.0131(4)
_cell_length_c                          11.1760(3)
_cell_angle_alpha                       90
_cell_angle_beta                        108.945(1)
_cell_angle_gamma                       90
_cell_volume                            1915.70(9)
_cell_formula_units_Z                   4
_cell_measurement_temperature           223(2)
_cell_measurement_reflns_used           18609
_cell_measurement_theta_min             3.705
_cell_measurement_theta_max             27.878
_cell_measurement_wavelength            0.71073
 
#----------------------------------------------------------------------------#
#                   CRYSTAL INFORMATION                                      #
#----------------------------------------------------------------------------#
 
_exptl_crystal_description              needle
_exptl_crystal_colour                   colourless
_exptl_crystal_size_max                 0.1
_exptl_crystal_size_mid                 0.1
_exptl_crystal_size_min                 0.1
_exptl_crystal_density_diffrn           1.399
_exptl_crystal_density_method           'not measured'
_exptl_crystal_F_000                    832
_exptl_special_details
;
 ?
;
 
#----------------------------------------------------------------------------#
#                   ABSORPTION CORRECTION                                    #
#----------------------------------------------------------------------------#
 
_exptl_absorpt_coefficient_mu           1.465
_exptl_absorpt_correction_type          multi-scan
_exptl_absorpt_process_details
;
        [c.f. r.h. blessing, acta cryst. (1995), a51, 33-38]
;
_exptl_absorpt_correction_T_min         0.8221
_exptl_absorpt_correction_T_max         0.8936
 
#----------------------------------------------------------------------------#
#                   DATA COLLECTION                                          #
#----------------------------------------------------------------------------#
 
_diffrn_ambient_temperature             223(2)
_diffrn_radiation_wavelength            0.71073
_diffrn_radiation_type                  MoK\a
_diffrn_radiation_monochromator         graphite
_diffrn_radiation_probe                 x-ray
_diffrn_measurement_device              '95mm CCD camera on \k-goniostat'
_diffrn_measurement_device_type         KappaCCD
_diffrn_measurement_method              CCD
_diffrn_reflns_av_R_equivalents         0.0594
_diffrn_reflns_av_unetI/netI            0.0561
_diffrn_reflns_number                   17329
_diffrn_reflns_limit_h_min              -14
_diffrn_reflns_limit_h_max              12
_diffrn_reflns_limit_k_min              -22
_diffrn_reflns_limit_k_max              21
_diffrn_reflns_limit_l_min              -11
_diffrn_reflns_limit_l_max              14
_diffrn_reflns_theta_min                3.73
_diffrn_reflns_theta_max                27.89
_diffrn_reflns_theta_full               27.89
_diffrn_measured_fraction_theta_full
                                        0.993
_diffrn_measured_fraction_theta_max
                                        0.993
_reflns_number_total                    4547
_reflns_number_gt                       3131
_reflns_threshold_expression            >2sigma(I)
 
#----------------------------------------------------------------------------#
#                   COMPUTER PROGRAMS USED                                   #
#----------------------------------------------------------------------------#
 
_computing_data_collection              'Collect (Nonius BV, 1997-2000)'
_computing_cell_refinement
                                       'HKL Scalepack (Otwinowski & Minor 1997)'
_computing_data_reduction
                             'HKL Denzo and Scalepack (Otwinowski & Minor 1997)'
_computing_structure_solution           'SHELXS-97 (Sheldrick, 1997)'
_computing_structure_refinement         'SHELXL-97 (Sheldrick, 1997)'
_computing_molecular_graphics           'Ortep-3 for Windows (Farrugia, 1997)'
_computing_publication_material
                                   'WinGX publication routines (Farrugia, 1999)'
 
#----------------------------------------------------------------------------#
#                   REFINEMENT INFORMATION                                   #
#----------------------------------------------------------------------------#
 
_refine_special_details
;
 Refinement of F^2^ against ALL reflections.  The weighted R-factor wR and
 goodness of fit S are based on F^2^, conventional R-factors R are based
 on F, with F set to zero for negative F^2^. The threshold expression of
 F^2^ > 2sigma(F^2^) is used only for calculating R-factors(gt) etc. and is
 not relevant to the choice of reflections for refinement.  R-factors based
 on F^2^ are statistically about twice as large as those based on F, and R-
 factors based on ALL data will be even larger.
;
_refine_ls_structure_factor_coef        Fsqd
_refine_ls_matrix_type                  full
_refine_ls_weighting_scheme             calc
_refine_ls_weighting_details
         'calc w=1/[\s^2^(Fo^2^)+(0.0314P)^2^+2.0172P] where P=(Fo^2^+2Fc^2^)/3'
_atom_sites_solution_primary            direct
_atom_sites_solution_secondary          difmap
_atom_sites_solution_hydrogens          geom
_refine_ls_hydrogen_treatment           riding
_refine_ls_extinction_method            none
_refine_ls_number_reflns                4547
_refine_ls_number_parameters            181
_refine_ls_number_restraints            0
_refine_ls_R_factor_all                 0.0735
_refine_ls_R_factor_gt                  0.0409
_refine_ls_wR_factor_ref                0.0914
_refine_ls_wR_factor_gt                 0.0811
_refine_ls_goodness_of_fit_ref          1.019
_refine_ls_restrained_S_all             1.019
_refine_ls_shift/su_max                 0.013
_refine_ls_shift/su_mean                0.001
_refine_diff_density_max                0.617
_refine_diff_density_min                -0.626
_refine_diff_density_rms                0.094
 
#----------------------------------------------------------------------------#
#                   ATOMIC TYPES, COORDINATES AND THERMAL PARAMETERS         #
#----------------------------------------------------------------------------#
 
loop_
    _atom_type_symbol
    _atom_type_description
    _atom_type_scat_dispersion_real
    _atom_type_scat_dispersion_imag
    _atom_type_scat_source
C C 0.0033 0.0016 'International Tables Vol C Tables 4.2.6.8 and 6.1.1.4'
H H 0 0 'International Tables Vol C Tables 4.2.6.8 and 6.1.1.4'
Cl Cl 0.1484 0.1585 'International Tables Vol C Tables 4.2.6.8 and 6.1.1.4'
Sn Sn -0.6537 1.4246 'International Tables Vol C Tables 4.2.6.8 and 6.1.1.4'
 
loop_
    _atom_site_label
    _atom_site_type_symbol
    _atom_site_fract_x
    _atom_site_fract_y
    _atom_site_fract_z
    _atom_site_U_iso_or_equiv
    _atom_site_adp_type
    _atom_site_occupancy
    _atom_site_symmetry_multiplicity
    _atom_site_calc_flag
    _atom_site_refinement_flags
    _atom_site_disorder_assembly
    _atom_site_disorder_group
Sn Sn 0.02881(2) 0.244216(13) 0.87120(2) 0.03221(10) Uani 1 1 d . . .
Cl Cl 0.02769(13) 0.23019(7) 1.08824(10) 0.0575(3) Uani 1 1 d . . .
C1 C 0.1271(4) 0.3566(2) 0.8817(4) 0.0390(9) Uani 1 1 d . . .
H1 H 0.0716 0.3867 0.8075 0.047 Uiso 1 1 calc R . .
C2 C 0.2628(4) 0.3538(2) 0.8682(4) 0.0522(11) Uani 1 1 d . . .
H2A H 0.2583 0.3254 0.7906 0.063 Uiso 1 1 calc R . .
H2B H 0.3232 0.3251 0.94 0.063 Uiso 1 1 calc R . .
C3 C 0.3173(5) 0.4364(3) 0.8632(5) 0.0653(13) Uani 1 1 d . . .
H3A H 0.4079 0.4326 0.86 0.078 Uiso 1 1 calc R . .
H3B H 0.2627 0.4628 0.7857 0.078 Uiso 1 1 calc R . .
C4 C 0.3181(5) 0.4848(3) 0.9756(5) 0.0687(14) Uani 1 1 d . . .
H4A H 0.3823 0.4626 1.052 0.082 Uiso 1 1 calc R . .
H4B H 0.3461 0.5385 0.9652 0.082 Uiso 1 1 calc R . .
C5 C 0.1836(6) 0.4869(3) 0.9910(5) 0.0734(15) Uani 1 1 d . . .
H5A H 0.1225 0.516 0.9202 0.088 Uiso 1 1 calc R . .
H5B H 0.1894 0.5148 1.0693 0.088 Uiso 1 1 calc R . .
C6 C 0.1284(5) 0.4048(3) 0.9955(5) 0.0616(13) Uani 1 1 d . . .
H6A H 0.1827 0.3781 1.0727 0.074 Uiso 1 1 calc R . .
H6B H 0.0378 0.409 0.9988 0.074 Uiso 1 1 calc R . .
C7 C -0.1850(4) 0.2461(3) 0.7765(4) 0.0508(11) Uani 1 1 d . . .
H7 H -0.1973 0.2571 0.6865 0.061 Uiso 1 1 calc R . .
C8 C -0.2495(5) 0.3089(4) 0.8179(9) 0.143(4) Uani 1 1 d . . .
H8A H -0.2113 0.3588 0.8029 0.172 Uiso 1 1 calc R . .
H8B H -0.2319 0.3039 0.9092 0.172 Uiso 1 1 calc R . .
C9 C -0.4012(6) 0.3112(4) 0.7510(10) 0.165(4) Uani 1 1 d . . .
H9A H -0.44 0.3507 0.7922 0.198 Uiso 1 1 calc R . .
H9B H -0.419 0.3275 0.6629 0.198 Uiso 1 1 calc R . .
C10 C -0.4644(5) 0.2377(4) 0.7526(7) 0.0877(19) Uani 1 1 d . . .
H10A H -0.4633 0.2265 0.839 0.105 Uiso 1 1 calc R . .
H10B H -0.5573 0.241 0.6984 0.105 Uiso 1 1 calc R . .
C11 C -0.4019(6) 0.1752(4) 0.7103(10) 0.177(5) Uani 1 1 d . . .
H11A H -0.4191 0.1808 0.6191 0.212 Uiso 1 1 calc R . .
H11B H -0.4412 0.1254 0.7243 0.212 Uiso 1 1 calc R . .
C12 C -0.2509(5) 0.1720(4) 0.7776(10) 0.158(4) Uani 1 1 d . . .
H12A H -0.234 0.1557 0.8656 0.19 Uiso 1 1 calc R . .
H12B H -0.2126 0.1321 0.7366 0.19 Uiso 1 1 calc R . .
C13 C 0.1344(4) 0.1371(2) 0.8610(4) 0.0433(10) Uani 1 1 d . . .
H13 H 0.1327 0.132 0.7722 0.052 Uiso 1 1 calc R . .
C14 C 0.2748(5) 0.1395(3) 0.9398(9) 0.133(3) Uani 1 1 d . . .
H14A H 0.2807 0.1489 1.028 0.16 Uiso 1 1 calc R . .
H14B H 0.3185 0.1835 0.9126 0.16 Uiso 1 1 calc R . .
C15 C 0.3479(6) 0.0630(3) 0.9319(10) 0.172(5) Uani 1 1 d . . .
H15A H 0.3537 0.0578 0.8466 0.207 Uiso 1 1 calc R . .
H15B H 0.4386 0.0658 0.9915 0.207 Uiso 1 1 calc R . .
C16 C 0.2820(5) -0.0072(3) 0.9608(5) 0.0767(16) Uani 1 1 d . . .
H16A H 0.328 -0.0545 0.9473 0.092 Uiso 1 1 calc R . .
H16B H 0.2868 -0.0059 1.0499 0.092 Uiso 1 1 calc R . .
C17 C 0.1429(5) -0.0102(3) 0.8803(6) 0.0787(17) Uani 1 1 d . . .
H17A H 0.0993 -0.055 0.9055 0.094 Uiso 1 1 calc R . .
H17B H 0.1385 -0.0181 0.7922 0.094 Uiso 1 1 calc R . .
C18 C 0.0695(5) 0.0649(3) 0.8902(6) 0.0777(17) Uani 1 1 d . . .
H18A H -0.0215 0.0618 0.8315 0.093 Uiso 1 1 calc R . .
H18B H 0.0648 0.0693 0.9761 0.093 Uiso 1 1 calc R . .
 
loop_
    _atom_site_aniso_label
    _atom_site_aniso_U_11
    _atom_site_aniso_U_22
    _atom_site_aniso_U_33
    _atom_site_aniso_U_23
    _atom_site_aniso_U_13
    _atom_site_aniso_U_12
Sn 0.02751(14) 0.03960(16) 0.03014(14) 0.00001(11) 0.01019(10) 0.00062(11)
Cl 0.0803(8) 0.0640(7) 0.0334(5) 0.0032(4) 0.0258(5) 0.0029(6)
C1 0.038(2) 0.041(2) 0.040(2) -0.0019(16) 0.0159(18) -0.0006(17)
C2 0.039(2) 0.058(3) 0.066(3) -0.010(2) 0.025(2) -0.007(2)
C3 0.050(3) 0.061(3) 0.091(4) -0.001(3) 0.032(3) -0.011(2)
C4 0.061(3) 0.055(3) 0.084(4) -0.012(3) 0.015(3) -0.016(2)
C5 0.088(4) 0.051(3) 0.090(4) -0.024(3) 0.041(3) -0.010(3)
C6 0.069(3) 0.056(3) 0.070(3) -0.021(2) 0.037(3) -0.010(2)
C7 0.028(2) 0.080(3) 0.043(2) 0.010(2) 0.0088(17) 0.003(2)
C8 0.044(3) 0.079(4) 0.273(10) -0.071(5) 0.005(5) 0.008(3)
C9 0.032(3) 0.097(5) 0.331(13) -0.051(6) 0.008(5) 0.013(3)
C10 0.030(3) 0.132(6) 0.102(5) 0.010(4) 0.024(3) -0.001(3)
C11 0.032(3) 0.118(6) 0.332(13) -0.094(7) -0.009(5) -0.006(4)
C12 0.032(3) 0.075(4) 0.323(12) -0.062(5) -0.004(5) -0.006(3)
C13 0.053(3) 0.045(2) 0.037(2) 0.0054(17) 0.022(2) 0.0113(19)
C14 0.037(3) 0.044(3) 0.288(10) -0.025(4) 0.010(4) 0.008(2)
C15 0.037(3) 0.054(4) 0.404(15) -0.019(6) 0.042(6) 0.012(3)
C16 0.073(4) 0.050(3) 0.091(4) 0.005(3) 0.004(3) 0.022(3)
C17 0.066(4) 0.042(3) 0.118(5) -0.007(3) 0.016(3) 0.002(2)
C18 0.051(3) 0.046(3) 0.130(5) -0.007(3) 0.021(3) 0.000(2)
 
 
#----------------------------------------------------------------------------#
#                   MOLECULAR GEOMETRY                                       #
#----------------------------------------------------------------------------#
 
_geom_special_details
;
 All esds (except the esd in the dihedral angle between two l.s. planes)
 are estimated using the full covariance matrix.  The cell esds are taken
 into account individually in the estimation of esds in distances, angles
 and torsion angles; correlations between esds in cell parameters are only
 used when they are defined by crystal symmetry.  An approximate (isotropic)
 treatment of cell esds is used for estimating esds involving l.s. planes.
;
loop_
    _geom_bond_atom_site_label_1
    _geom_bond_atom_site_label_2
    _geom_bond_distance
    _geom_bond_site_symmetry_2
    _geom_bond_publ_flag
Sn C13 2.163(4) . ?
Sn C1 2.165(4) . ?
Sn C7 2.178(4) . ?
Sn Cl 2.4412(11) . ?
Sn Cl 3.1884(11) 4_565 ?
Cl Sn 3.1884(11) 4_566 ?
C1 C2 1.502(5) . ?
C1 C6 1.510(5) . ?
C2 C3 1.529(6) . ?
C3 C4 1.499(7) . ?
C4 C5 1.498(7) . ?
C5 C6 1.522(6) . ?
C7 C8 1.426(7) . ?
C7 C12 1.444(7) . ?
C8 C9 1.545(8) . ?
C9 C10 1.423(8) . ?
C10 C11 1.414(8) . ?
C11 C12 1.540(8) . ?
C13 C14 1.470(7) . ?
C13 C18 1.497(6) . ?
C14 C15 1.535(7) . ?
C15 C16 1.473(8) . ?
C16 C17 1.463(7) . ?
C17 C18 1.520(6) . ?
 
loop_
    _geom_angle_atom_site_label_1
    _geom_angle_atom_site_label_2
    _geom_angle_atom_site_label_3
    _geom_angle
    _geom_angle_site_symmetry_1
    _geom_angle_site_symmetry_3
    _geom_angle_publ_flag
C13 Sn C1 119.75(16) . . ?
C13 Sn C7 117.78(16) . . ?
C1 Sn C7 115.12(15) . . ?
C13 Sn Cl 98.08(11) . . ?
C1 Sn Cl 101.01(10) . . ?
C7 Sn Cl 98.18(12) . . ?
C13 Sn Cl 84.10(10) . 4_565 ?
C1 Sn Cl 77.23(10) . 4_565 ?
C7 Sn Cl 81.36(12) . 4_565 ?
Cl Sn Cl 177.712(17) . 4_565 ?
Sn Cl Sn 166.53(5) . 4_566 ?
C2 C1 C6 110.9(3) . . ?
C2 C1 Sn 115.5(3) . . ?
C6 C1 Sn 113.4(3) . . ?
C1 C2 C3 111.3(4) . . ?
C4 C3 C2 111.9(4) . . ?
C5 C4 C3 111.3(4) . . ?
C4 C5 C6 112.1(4) . . ?
C1 C6 C5 111.6(4) . . ?
C8 C7 C12 111.3(5) . . ?
C8 C7 Sn 113.1(3) . . ?
C12 C7 Sn 114.7(3) . . ?
C7 C8 C9 113.6(5) . . ?
C10 C9 C8 113.4(6) . . ?
C11 C10 C9 112.3(6) . . ?
C10 C11 C12 113.2(6) . . ?
C7 C12 C11 113.5(6) . . ?
C14 C13 C18 110.1(4) . . ?
C14 C13 Sn 113.0(3) . . ?
C18 C13 Sn 113.3(3) . . ?
C13 C14 C15 112.2(5) . . ?
C16 C15 C14 112.8(6) . . ?
C17 C16 C15 110.7(5) . . ?
C16 C17 C18 111.6(4) . . ?
C13 C18 C17 112.9(4) . . ?
 
#===END

 
data_cy3sncl248
 
_audit_creation_date            2002-09-09T16:46:55-00:00
_audit_creation_method         'WinGX routine CIF_UPDATE'
_audit_conform_dict_name        cif_core.dic
_audit_conform_dict_version     2.2
_audit_conform_dict_location    ftp://ftp.iucr.org/pub/cif_core.dic
_publ_requested_category        FM
 
#----------------------------------------------------------------------------#
#                   CHEMICAL INFORMATION                                     #
#----------------------------------------------------------------------------#
 
_chemical_name_common
;
 '[cy3SnCl] at 248K '
;
_chemical_formula_moiety                'C18 H33 Cl1 Sn1'
_chemical_formula_sum                   'C18 H33 Cl Sn'
_chemical_formula_weight                403.58
_chemical_compound_source               'synthesis as described'
 
#----------------------------------------------------------------------------#
#                   UNIT CELL INFORMATION                                    #
#----------------------------------------------------------------------------#
 
_symmetry_cell_setting                  monoclinic
_symmetry_space_group_name_H-M          P2(1)/m
_symmetry_Int_Tables_number             11
loop_
    _symmetry_equiv_pos_as_xyz
'x, y, z'
'-x, y+1/2, -z'
'-x, -y, -z'
'x, -y-1/2, z'
 
_cell_length_a                          10.6230(4)
_cell_length_b                          17.0754(6)
_cell_length_c                          5.6281(2)
_cell_angle_alpha                       90
_cell_angle_beta                        108.487(2)
_cell_angle_gamma                       90
_cell_volume                            968.21(6)
_cell_formula_units_Z                   2
_cell_measurement_temperature           248(2)
_cell_measurement_reflns_used           15154
_cell_measurement_theta_min             4
_cell_measurement_theta_max             28
_cell_measurement_wavelength            0.71073
 
#----------------------------------------------------------------------------#
#                   CRYSTAL INFORMATION                                      #
#----------------------------------------------------------------------------#
 
_exptl_crystal_description              needle
_exptl_crystal_colour                   colourless
_exptl_crystal_size_max                 0.1
_exptl_crystal_size_mid                 0.1
_exptl_crystal_size_min                 0.1
_exptl_crystal_density_diffrn           1.384
_exptl_crystal_density_method           'not measured'
_exptl_crystal_F_000                    416
_exptl_special_details
;
 ?
;
 
#----------------------------------------------------------------------------#
#                   ABSORPTION CORRECTION                                    #
#----------------------------------------------------------------------------#
 
_exptl_absorpt_coefficient_mu           1.449
_exptl_absorpt_correction_type          multi-scan
_exptl_absorpt_process_details
;
        [c.f. r.h. blessing, acta cryst. (1995), a51, 33-38]
;
_exptl_absorpt_correction_T_min         0.8205
_exptl_absorpt_correction_T_max         0.8937
 
#----------------------------------------------------------------------------#
#                   DATA COLLECTION                                          #
#----------------------------------------------------------------------------#
 
_diffrn_ambient_temperature             248(2)
_diffrn_radiation_wavelength            0.71073
_diffrn_radiation_type                  MoK\a
_diffrn_radiation_monochromator         graphite
_diffrn_radiation_probe                 x-ray
_diffrn_reflns_av_R_equivalents         0.0504
_diffrn_reflns_av_unetI/netI            0.0483
_diffrn_reflns_number                   8913
_diffrn_reflns_limit_h_min              -12
_diffrn_reflns_limit_h_max              13
_diffrn_reflns_limit_k_min              -21
_diffrn_reflns_limit_k_max              22
_diffrn_reflns_limit_l_min              -7
_diffrn_reflns_limit_l_max              5
_diffrn_reflns_theta_min                3.71
_diffrn_reflns_theta_max                27.89
_diffrn_reflns_theta_full               27.89
_diffrn_measured_fraction_theta_full
                                        0.993
_diffrn_measured_fraction_theta_max
                                        0.993
_reflns_number_total                    2382
_reflns_number_gt                       1788
_reflns_threshold_expression            >2sigma(I)
 
#----------------------------------------------------------------------------#
#                   COMPUTER PROGRAMS USED                                   #
#----------------------------------------------------------------------------#
 
_computing_structure_solution           'SHELXS-97 (Sheldrick, 1997)'
_computing_structure_refinement         'SHELXL-97 (Sheldrick, 1997)'
_computing_molecular_graphics           'Ortep-3 for Windows (Farrugia, 1997)'
_computing_publication_material
                                   'WinGX publication routines (Farrugia, 1999)'
 
#----------------------------------------------------------------------------#
#                   REFINEMENT INFORMATION                                   #
#----------------------------------------------------------------------------#
 
_refine_special_details
;
 Refinement of F^2^ against ALL reflections.  The weighted R-factor wR and
 goodness of fit S are based on F^2^, conventional R-factors R are based
 on F, with F set to zero for negative F^2^. The threshold expression of
 F^2^ > 2sigma(F^2^) is used only for calculating R-factors(gt) etc. and is
 not relevant to the choice of reflections for refinement.  R-factors based
 on F^2^ are statistically about twice as large as those based on F, and R-
 factors based on ALL data will be even larger.
;
_refine_ls_structure_factor_coef        Fsqd
_refine_ls_matrix_type                  full
_refine_ls_weighting_scheme             calc
_refine_ls_weighting_details
         'calc w=1/[\s^2^(Fo^2^)+(0.0659P)^2^+1.5049P] where P=(Fo^2^+2Fc^2^)/3'
_atom_sites_solution_primary            direct
_atom_sites_solution_secondary          difmap
_atom_sites_solution_hydrogens          geom
_refine_ls_hydrogen_treatment           riding
_refine_ls_extinction_method            none
_refine_ls_number_reflns                2382
_refine_ls_number_parameters            97
_refine_ls_number_restraints            0
_refine_ls_R_factor_all                 0.0772
_refine_ls_R_factor_gt                  0.0513
_refine_ls_wR_factor_ref                0.1367
_refine_ls_wR_factor_gt                 0.1232
_refine_ls_goodness_of_fit_ref          1.058
_refine_ls_restrained_S_all             1.058
_refine_ls_shift/su_max                 0
_refine_ls_shift/su_mean                0
_refine_diff_density_max                0.686
_refine_diff_density_min                -0.716
_refine_diff_density_rms                0.108
 
#----------------------------------------------------------------------------#
#                   ATOMIC TYPES, COORDINATES AND THERMAL PARAMETERS         #
#----------------------------------------------------------------------------#
 
loop_
    _atom_type_symbol
    _atom_type_description
    _atom_type_scat_dispersion_real
    _atom_type_scat_dispersion_imag
    _atom_type_scat_source
C C 0.0033 0.0016 'International Tables Vol C Tables 4.2.6.8 and 6.1.1.4'
H H 0 0 'International Tables Vol C Tables 4.2.6.8 and 6.1.1.4'
Cl Cl 0.1484 0.1585 'International Tables Vol C Tables 4.2.6.8 and 6.1.1.4'
Sn Sn -0.6537 1.4246 'International Tables Vol C Tables 4.2.6.8 and 6.1.1.4'
 
loop_
    _atom_site_label
    _atom_site_type_symbol
    _atom_site_fract_x
    _atom_site_fract_y
    _atom_site_fract_z
    _atom_site_U_iso_or_equiv
    _atom_site_adp_type
    _atom_site_occupancy
    _atom_site_symmetry_multiplicity
    _atom_site_calc_flag
    _atom_site_refinement_flags
    _atom_site_disorder_assembly
    _atom_site_disorder_group
Sn Sn 0.03152(4) 0.25 0.25440(8) 0.0484(2) Uani 1 2 d S . .
Cl Cl 0.0304(3) 0.25 0.6847(5) 0.1143(12) Uani 1 2 d S . .
C1 C 0.1335(6) 0.3587(4) 0.2502(12) 0.0679(15) Uani 1 1 d . . .
H1 H 0.0978 0.3783 0.0762 0.082 Uiso 1 1 calc R . .
C2 C 0.2700(9) 0.3548(6) 0.301(3) 0.180(7) Uani 1 1 d . . .
H2A H 0.2896 0.3185 0.182 0.216 Uiso 1 1 calc R . .
H2B H 0.3105 0.3336 0.4696 0.216 Uiso 1 1 calc R . .
C3 C 0.3333(11) 0.4354(6) 0.283(4) 0.195(7) Uani 1 1 d . . .
H3A H 0.4299 0.4295 0.333 0.234 Uiso 1 1 calc R . .
H3B H 0.3027 0.453 0.1077 0.234 Uiso 1 1 calc R . .
C4 C 0.3007(12) 0.4949(7) 0.4380(19) 0.135(4) Uani 1 1 d . . .
H4A H 0.337 0.4806 0.6154 0.163 Uiso 1 1 calc R . .
H4B H 0.3381 0.5456 0.4133 0.163 Uiso 1 1 calc R . .
C5 C 0.1660(15) 0.4993(7) 0.368(4) 0.277(13) Uani 1 1 d . . .
H5A H 0.1313 0.515 0.1918 0.332 Uiso 1 1 calc R . .
H5B H 0.1402 0.5393 0.4687 0.332 Uiso 1 1 calc R . .
C6 C 0.1031(17) 0.4182(8) 0.404(5) 0.283(13) Uani 1 1 d . . .
H6A H 0.1374 0.4025 0.5799 0.339 Uiso 1 1 calc R . .
H6B H 0.0066 0.4239 0.359 0.339 Uiso 1 1 calc R . .
C7 C -0.1813(8) 0.25 0.0678(17) 0.073(2) Uani 1 2 d S . .
H7 H -0.192 0.25 -0.1135 0.087 Uiso 1 2 calc SR . .
C8 C -0.2467(9) 0.3186(6) 0.107(3) 0.206(9) Uani 1 1 d . . .
H8A H -0.2072 0.364 0.0515 0.248 Uiso 1 1 calc R . .
H8B H -0.2319 0.3246 0.2874 0.248 Uiso 1 1 calc R . .
C9 C -0.3976(9) 0.3180(7) -0.031(4) 0.219(9) Uani 1 1 d . . .
H9A H -0.4379 0.3641 0.0188 0.262 Uiso 1 1 calc R . .
H9B H -0.4127 0.3216 -0.2122 0.262 Uiso 1 1 calc R . .
C10 C -0.4604(10) 0.25 0.019(3) 0.119(5) Uani 1 2 d S . .
H10A H -0.457 0.25 0.1946 0.143 Uiso 1 2 calc SR . .
H10B H -0.5538 0.25 -0.0856 0.143 Uiso 1 2 calc SR . .
 
loop_
    _atom_site_aniso_label
    _atom_site_aniso_U_11
    _atom_site_aniso_U_22
    _atom_site_aniso_U_33
    _atom_site_aniso_U_23
    _atom_site_aniso_U_13
    _atom_site_aniso_U_12
Sn 0.0400(3) 0.0649(4) 0.0418(3) 0 0.0151(2) 0
Cl 0.104(2) 0.202(4) 0.0438(11) 0 0.0345(13) 0
C1 0.062(4) 0.070(4) 0.071(4) -0.011(3) 0.020(3) -0.010(3)
C2 0.071(6) 0.080(6) 0.38(2) 0.018(9) 0.066(9) -0.011(5)
C3 0.105(8) 0.096(7) 0.41(2) -0.034(11) 0.126(11) -0.038(6)
C4 0.136(9) 0.144(9) 0.126(8) -0.057(7) 0.042(7) -0.085(8)
C5 0.170(14) 0.111(9) 0.61(4) -0.147(17) 0.205(19) -0.060(9)
C6 0.230(15) 0.142(10) 0.60(3) -0.202(16) 0.31(2) -0.125(11)
C7 0.038(4) 0.118(8) 0.065(5) 0 0.020(4) 0
C8 0.048(4) 0.095(7) 0.43(3) 0.002(10) 0.006(8) 0.005(5)
C9 0.046(5) 0.134(9) 0.43(3) 0.058(12) 0.016(9) 0.013(6)
C10 0.043(5) 0.178(13) 0.141(11) 0 0.034(6) 0
 
 
#----------------------------------------------------------------------------#
#                   MOLECULAR GEOMETRY                                       #
#----------------------------------------------------------------------------#
 
_geom_special_details
;
 All esds (except the esd in the dihedral angle between two l.s. planes)
 are estimated using the full covariance matrix.  The cell esds are taken
 into account individually in the estimation of esds in distances, angles
 and torsion angles; correlations between esds in cell parameters are only
 used when they are defined by crystal symmetry.  An approximate (isotropic)
 treatment of cell esds is used for estimating esds involving l.s. planes.
;
loop_
    _geom_bond_atom_site_label_1
    _geom_bond_atom_site_label_2
    _geom_bond_distance
    _geom_bond_site_symmetry_2
    _geom_bond_publ_flag
Sn C1 2.153(6) . ?
Sn C1 2.153(6) 4_565 ?
Sn C7 2.170(8) . ?
Sn Cl 2.426(2) . ?
Sn Cl 3.202(2) 1_554 ?
Cl Sn 3.202(2) 1_556 ?
C1 C2 1.388(11) . ?
C1 C6 1.435(12) . ?
C2 C3 1.550(12) . ?
C3 C4 1.452(14) . ?
C4 C5 1.360(17) . ?
C5 C6 1.577(16) . ?
C7 C8 1.415(11) 4_565 ?
C7 C8 1.415(11) . ?
C8 C9 1.545(13) . ?
C9 C10 1.411(13) . ?
C10 C9 1.411(13) 4_565 ?
 
loop_
    _geom_angle_atom_site_label_1
    _geom_angle_atom_site_label_2
    _geom_angle_atom_site_label_3
    _geom_angle
    _geom_angle_site_symmetry_1
    _geom_angle_site_symmetry_3
    _geom_angle_publ_flag
C1 Sn C1 119.1(3) . 4_565 ?
C1 Sn C7 116.45(18) . . ?
C1 Sn C7 116.45(18) 4_565 . ?
C1 Sn Cl 99.95(17) . . ?
C1 Sn Cl 99.95(17) 4_565 . ?
C7 Sn Cl 98.6(2) . . ?
C1 Sn Cl 80.28(17) . 1_554 ?
C1 Sn Cl 80.28(17) 4_565 1_554 ?
C7 Sn Cl 81.0(2) . 1_554 ?
Cl Sn Cl 179.52(13) . 1_554 ?
Sn Cl Sn 179.52(13) . 1_556 ?
C2 C1 C6 109.3(10) . . ?
C2 C1 Sn 116.9(5) . . ?
C6 C1 Sn 113.2(6) . . ?
C1 C2 C3 113.0(8) . . ?
C4 C3 C2 113.0(11) . . ?
C5 C4 C3 107.1(9) . . ?
C4 C5 C6 111.4(14) . . ?
C1 C6 C5 111.1(10) . . ?
C8 C7 C8 111.8(11) 4_565 . ?
C8 C7 Sn 114.3(5) 4_565 . ?
C8 C7 Sn 114.3(5) . . ?
C7 C8 C9 113.4(10) . . ?
C10 C9 C8 112.6(10) . . ?
C9 C10 C9 110.8(14) 4_565 . ?
 
#===END

 
 
 
data_cy3SnCl273
 
_audit_creation_date            2002-09-23T09:22:15-00:00
_audit_creation_method         'WinGX routine CIF_UPDATE'
_audit_conform_dict_name        cif_core.dic
_audit_conform_dict_version     2.2
_audit_conform_dict_location    ftp://ftp.iucr.org/pub/cif_core.dic
_publ_requested_category        FM
 
#----------------------------------------------------------------------------#
#                   CHEMICAL INFORMATION                                     #
#----------------------------------------------------------------------------#
 
_chemical_name_systematic
;
 ?
;
_chemical_name_common                   [cy3SnCl] at 273K '
_chemical_formula_moiety                'C18 H33 Cl1 Sn1'
_chemical_formula_sum                   'C18 H33 Cl Sn'
_chemical_formula_weight                403.58
_chemical_compound_source               'synthesis as described'
 
#----------------------------------------------------------------------------#
#                   UNIT CELL INFORMATION                                    #
#----------------------------------------------------------------------------#
 
_symmetry_cell_setting                  monoclinic
_symmetry_space_group_name_H-M          P2(1)/m
_symmetry_Int_Tables_number             11
loop_
    _symmetry_equiv_pos_as_xyz
'x, y, z'
'-x, y+1/2, -z'
'-x, -y, -z'
'x, -y-1/2, z'
 
_cell_length_a                          10.5668(4)
_cell_length_b                          17.1827(5)
_cell_length_c                          5.6769(2)
_cell_angle_alpha                       90
_cell_angle_beta                        107.852(2)
_cell_angle_gamma                       90
_cell_volume                            981.10(6)
_cell_formula_units_Z                   2
_cell_measurement_temperature           273(2)
_cell_measurement_reflns_used           12318
_cell_measurement_theta_min             3.705
_cell_measurement_theta_max             27.878
_cell_measurement_wavelength            0.71073
 
#----------------------------------------------------------------------------#
#                   CRYSTAL INFORMATION                                      #
#----------------------------------------------------------------------------#
 
_exptl_crystal_description              needle
_exptl_crystal_colour                   colourless
_exptl_crystal_size_max                 0.1
_exptl_crystal_size_mid                 0.1
_exptl_crystal_size_min                 0.1
_exptl_crystal_density_diffrn           1.366
_exptl_crystal_density_method           'not measured'
_exptl_crystal_F_000                    416
_exptl_special_details
;
 ?
;
 
#----------------------------------------------------------------------------#
#                   ABSORPTION CORRECTION                                    #
#----------------------------------------------------------------------------#
 
_exptl_absorpt_coefficient_mu           1.43
_exptl_absorpt_correction_type          multi-scan
_exptl_absorpt_process_details
;
        [c.f. r.h. blessing, acta cryst. (1995), a51, 33-38]
;
_exptl_absorpt_correction_T_min         0.8105
_exptl_absorpt_correction_T_max         0.9102
 
#----------------------------------------------------------------------------#
#                   DATA COLLECTION                                          #
#----------------------------------------------------------------------------#
 
_diffrn_ambient_temperature             273(2)
_diffrn_radiation_wavelength            0.71073
_diffrn_radiation_type                  MoK\a
_diffrn_radiation_monochromator         graphite
_diffrn_radiation_probe                 x-ray
_diffrn_measurement_device              '95mm CCD camera on \k-goniostat'
_diffrn_measurement_device_type         KappaCCD
_diffrn_measurement_method              CCD
_diffrn_reflns_av_R_equivalents         0.0451
_diffrn_reflns_av_unetI/netI            0.0412
_diffrn_reflns_number                   8829
_diffrn_reflns_limit_h_min              -11
_diffrn_reflns_limit_h_max              13
_diffrn_reflns_limit_k_min              -21
_diffrn_reflns_limit_k_max              22
_diffrn_reflns_limit_l_min              -7
_diffrn_reflns_limit_l_max              6
_diffrn_reflns_theta_min                3.77
_diffrn_reflns_theta_max                27.89
_diffrn_reflns_theta_full               27.89
_diffrn_measured_fraction_theta_full
                                        0.989
_diffrn_measured_fraction_theta_max
                                        0.989
_reflns_number_total                    2403
_reflns_number_gt                       1846
_reflns_threshold_expression            >2sigma(I)
 
#----------------------------------------------------------------------------#
#                   COMPUTER PROGRAMS USED                                   #
#----------------------------------------------------------------------------#
 
_computing_data_collection              'Collect (Nonius BV, 1997-2000)'
_computing_cell_refinement
                                       'HKL Scalepack (Otwinowski & Minor 1997)'
_computing_data_reduction
                             'HKL Denzo and Scalepack (Otwinowski & Minor 1997)'
_computing_structure_solution           'SHELXS-97 (Sheldrick, 1997)'
_computing_structure_refinement         'SHELXL-97 (Sheldrick, 1997)'
_computing_molecular_graphics           'Ortep-3 for Windows (Farrugia, 1997)'
_computing_publication_material
                                   'WinGX publication routines (Farrugia, 1999)'
 
#----------------------------------------------------------------------------#
#                   REFINEMENT INFORMATION                                   #
#----------------------------------------------------------------------------#
 
_refine_special_details
;
 Refinement of F^2^ against ALL reflections.  The weighted R-factor wR and
 goodness of fit S are based on F^2^, conventional R-factors R are based
 on F, with F set to zero for negative F^2^. The threshold expression of
 F^2^ > 2sigma(F^2^) is used only for calculating R-factors(gt) etc. and is
 not relevant to the choice of reflections for refinement.  R-factors based
 on F^2^ are statistically about twice as large as those based on F, and R-
 factors based on ALL data will be even larger.
;
_refine_ls_structure_factor_coef        Fsqd
_refine_ls_matrix_type                  full
_refine_ls_weighting_scheme             calc
_refine_ls_weighting_details
         'calc w=1/[\s^2^(Fo^2^)+(0.0785P)^2^+0.8332P] where P=(Fo^2^+2Fc^2^)/3'
_atom_sites_solution_primary            direct
_atom_sites_solution_secondary          difmap
_atom_sites_solution_hydrogens          geom
_refine_ls_hydrogen_treatment           riding
_refine_ls_extinction_method            none
_refine_ls_number_reflns                2403
_refine_ls_number_parameters            97
_refine_ls_number_restraints            0
_refine_ls_R_factor_all                 0.0707
_refine_ls_R_factor_gt                  0.0511
_refine_ls_wR_factor_ref                0.1445
_refine_ls_wR_factor_gt                 0.1317
_refine_ls_goodness_of_fit_ref          1.045
_refine_ls_restrained_S_all             1.045
_refine_ls_shift/su_max                 0
_refine_ls_shift/su_mean                0
_refine_diff_density_max                0.579
_refine_diff_density_min                -0.757
_refine_diff_density_rms                0.09
 
#----------------------------------------------------------------------------#
#                   ATOMIC TYPES, COORDINATES AND THERMAL PARAMETERS         #
#----------------------------------------------------------------------------#
 
loop_
    _atom_type_symbol
    _atom_type_description
    _atom_type_scat_dispersion_real
    _atom_type_scat_dispersion_imag
    _atom_type_scat_source
C C 0.0033 0.0016 'International Tables Vol C Tables 4.2.6.8 and 6.1.1.4'
H H 0 0 'International Tables Vol C Tables 4.2.6.8 and 6.1.1.4'
Cl Cl 0.1484 0.1585 'International Tables Vol C Tables 4.2.6.8 and 6.1.1.4'
Sn Sn -0.6537 1.4246 'International Tables Vol C Tables 4.2.6.8 and 6.1.1.4'
 
loop_
    _atom_site_label
    _atom_site_type_symbol
    _atom_site_fract_x
    _atom_site_fract_y
    _atom_site_fract_z
    _atom_site_U_iso_or_equiv
    _atom_site_adp_type
    _atom_site_occupancy
    _atom_site_symmetry_multiplicity
    _atom_site_calc_flag
    _atom_site_refinement_flags
    _atom_site_disorder_assembly
    _atom_site_disorder_group
Sn Sn 0.03438(4) 0.25 0.27237(8) 0.0592(2) Uani 1 2 d S . .
Cl Cl 0.0325(4) 0.25 0.6969(5) 0.1228(10) Uani 1 2 d S . .
C1 C 0.1372(7) 0.3578(4) 0.2671(13) 0.0864(17) Uani 1 1 d . . .
H1 H 0.1126 0.3709 0.0908 0.104 Uiso 1 1 calc R . .
C2 C 0.2711(11) 0.3555(7) 0.337(4) 0.270(12) Uani 1 1 d . . .
H2A H 0.2981 0.318 0.2338 0.324 Uiso 1 1 calc R . .
H2B H 0.3033 0.337 0.5063 0.324 Uiso 1 1 calc R . .
C3 C 0.3389(13) 0.4348(7) 0.320(5) 0.273(12) Uani 1 1 d . . .
H3A H 0.434 0.4293 0.3971 0.327 Uiso 1 1 calc R . .
H3B H 0.3239 0.4473 0.1471 0.327 Uiso 1 1 calc R . .
C4 C 0.2942(14) 0.4965(7) 0.431(3) 0.164(5) Uani 1 1 d . . .
H4A H 0.322 0.4896 0.6093 0.197 Uiso 1 1 calc R . .
H4B H 0.3315 0.545 0.3948 0.197 Uiso 1 1 calc R . .
C5 C 0.1633(17) 0.4988(7) 0.344(5) 0.321(16) Uani 1 1 d . . .
H5A H 0.1379 0.5127 0.1701 0.385 Uiso 1 1 calc R . .
H5B H 0.1313 0.5395 0.4296 0.385 Uiso 1 1 calc R . .
C6 C 0.0946(18) 0.4220(8) 0.371(5) 0.273(11) Uani 1 1 d . . .
H6A H 0.1097 0.412 0.5457 0.327 Uiso 1 1 calc R . .
H6B H -0.0005 0.4281 0.2942 0.327 Uiso 1 1 calc R . .
C7 C -0.1787(8) 0.25 0.0860(16) 0.082(2) Uani 1 2 d S . .
H7 H -0.1855 0.25 -0.09 0.098 Uiso 1 2 calc SR . .
C8 C -0.2448(9) 0.3174(7) 0.115(4) 0.241(10) Uani 1 1 d . . .
H8A H -0.2047 0.3611 0.056 0.289 Uiso 1 1 calc R . .
H8B H -0.2316 0.3254 0.2897 0.289 Uiso 1 1 calc R . .
C9 C -0.3946(9) 0.3174(8) -0.022(4) 0.254(11) Uani 1 1 d . . .
H9A H -0.4349 0.3633 0.025 0.305 Uiso 1 1 calc R . .
H9B H -0.4092 0.3195 -0.1987 0.305 Uiso 1 1 calc R . .
C10 C -0.4556(12) 0.25 0.037(3) 0.145(5) Uani 1 2 d S . .
H10A H -0.4475 0.25 0.2115 0.174 Uiso 1 2 calc SR . .
H10B H -0.5495 0.25 -0.0563 0.174 Uiso 1 2 calc SR . .
 
loop_
    _atom_site_aniso_label
    _atom_site_aniso_U_11
    _atom_site_aniso_U_22
    _atom_site_aniso_U_33
    _atom_site_aniso_U_23
    _atom_site_aniso_U_13
    _atom_site_aniso_U_12
Sn 0.0543(3) 0.0711(4) 0.0547(3) 0 0.0200(2) 0
Cl 0.142(3) 0.178(3) 0.0588(11) 0 0.0461(14) 0
C1 0.085(4) 0.088(4) 0.092(4) -0.011(3) 0.035(3) -0.017(3)
C2 0.086(7) 0.097(7) 0.60(4) 0.033(12) 0.063(12) -0.018(6)
C3 0.134(9) 0.116(8) 0.59(4) -0.064(14) 0.151(16) -0.058(8)
C4 0.158(10) 0.131(8) 0.195(12) -0.050(7) 0.040(8) -0.081(8)
C5 0.166(13) 0.091(8) 0.72(5) -0.081(16) 0.16(2) -0.047(8)
C6 0.204(14) 0.119(9) 0.57(3) -0.110(14) 0.230(19) -0.068(10)
C7 0.052(4) 0.123(7) 0.069(5) 0 0.017(4) 0
C8 0.064(5) 0.108(7) 0.50(3) -0.013(11) 0.008(9) 0.003(5)
C9 0.062(5) 0.152(10) 0.50(3) 0.063(13) 0.017(10) 0.012(6)
C10 0.068(6) 0.203(15) 0.176(14) 0 0.055(8) 0
 
 
#----------------------------------------------------------------------------#
#                   MOLECULAR GEOMETRY                                       #
#----------------------------------------------------------------------------#
 
_geom_special_details
;
 All esds (except the esd in the dihedral angle between two l.s. planes)
 are estimated using the full covariance matrix.  The cell esds are taken
 into account individually in the estimation of esds in distances, angles
 and torsion angles; correlations between esds in cell parameters are only
 used when they are defined by crystal symmetry.  An approximate (isotropic)
 treatment of cell esds is used for estimating esds involving l.s. planes.
;
loop_
    _geom_bond_atom_site_label_1
    _geom_bond_atom_site_label_2
    _geom_bond_distance
    _geom_bond_site_symmetry_2
    _geom_bond_publ_flag
Sn C1 2.153(6) . ?
Sn C1 2.153(6) 4_565 ?
Sn C7 2.175(8) . ?
Sn Cl 2.416(3) . ?
Sn Cl 3.261(3) 1_554 ?
Cl Sn 3.261(3) 1_556 ?
C1 C2 1.347(13) . ?
C1 C6 1.390(14) . ?
C2 C3 1.556(15) . ?
C3 C4 1.388(17) . ?
C4 C5 1.32(2) . ?
C5 C6 1.536(16) . ?
C7 C8 1.387(12) 4_565 ?
C7 C8 1.387(12) . ?
C8 C9 1.535(14) . ?
C9 C10 1.414(14) . ?
C10 C9 1.414(14) 4_565 ?
 
loop_
    _geom_angle_atom_site_label_1
    _geom_angle_atom_site_label_2
    _geom_angle_atom_site_label_3
    _geom_angle
    _geom_angle_site_symmetry_1
    _geom_angle_site_symmetry_3
    _geom_angle_publ_flag
C1 Sn C1 118.8(4) . 4_565 ?
C1 Sn C7 116.4(2) . . ?
C1 Sn C7 116.4(2) 4_565 . ?
C1 Sn Cl 99.92(19) . . ?
C1 Sn Cl 99.92(19) 4_565 . ?
C7 Sn Cl 99.3(2) . . ?
C1 Sn Cl 80.46(19) . 1_554 ?
C1 Sn Cl 80.46(19) 4_565 1_554 ?
C7 Sn Cl 79.9(2) . 1_554 ?
Cl Sn Cl 179.24(15) . 1_554 ?
Sn Cl Sn 179.24(15) . 1_556 ?
C2 C1 C6 110.3(12) . . ?
C2 C1 Sn 117.3(7) . . ?
C6 C1 Sn 116.5(6) . . ?
C1 C2 C3 114.7(10) . . ?
C4 C3 C2 114.5(13) . . ?
C5 C4 C3 108.4(12) . . ?
C4 C5 C6 114.3(16) . . ?
C1 C6 C5 114.5(11) . . ?
C8 C7 C8 113.2(12) 4_565 . ?
C8 C7 Sn 115.2(6) 4_565 . ?
C8 C7 Sn 115.2(6) . . ?
C7 C8 C9 114.8(11) . . ?
C10 C9 C8 110.8(12) . . ?
C9 C10 C9 110.1(16) 4_565 . ?
 
#===END

 
 
 
data_cy3sncl298
 
_audit_creation_date            2002-09-09T14:48:21-00:00
_audit_creation_method         'WinGX routine CIF_UPDATE'
_audit_conform_dict_name        cif_core.dic
_audit_conform_dict_version     2.2
_audit_conform_dict_location    ftp://ftp.iucr.org/pub/cif_core.dic
_publ_requested_category        FM
 
#----------------------------------------------------------------------------#
#                   CHEMICAL INFORMATION                                     #
#----------------------------------------------------------------------------#
 
_chemical_name_systematic
;
 ?
;
_chemical_name_common                   '[cy3SnCl] at 298K '
_chemical_formula_moiety                'C18 H33 Cl1 Sn1'
_chemical_formula_sum                   'C18 H33 Cl Sn'
_chemical_formula_weight                403.58
_chemical_compound_source               'synthesis as described'
 
#----------------------------------------------------------------------------#
#                   UNIT CELL INFORMATION                                    #
#----------------------------------------------------------------------------#
 
_symmetry_cell_setting                  monoclinic
_symmetry_space_group_name_H-M          P2(1)/m
_symmetry_Int_Tables_number             11
loop_
    _symmetry_equiv_pos_as_xyz
'x, y, z'
'-x, y+1/2, -z'
'-x, -y, -z'
'x, -y-1/2, z'
 
_cell_length_a                          10.5453(4)
_cell_length_b                          17.1991(7)
_cell_length_c                          5.7130(2)
_cell_angle_alpha                       90
_cell_angle_beta                        107.392(2)
_cell_angle_gamma                       90
_cell_volume                            988.79(6)
_cell_formula_units_Z                   2
_cell_measurement_temperature           298(2)
_cell_measurement_reflns_used           19340
_cell_measurement_theta_min             3.705
_cell_measurement_theta_max             27.878
_cell_measurement_wavelength            0.71073
 
#----------------------------------------------------------------------------#
#                   CRYSTAL INFORMATION                                      #
#----------------------------------------------------------------------------#
 
_exptl_crystal_description              needle
_exptl_crystal_colour                   colourless
_exptl_crystal_size_max                 0.1
_exptl_crystal_size_mid                 0.1
_exptl_crystal_size_min                 0.1
_exptl_crystal_density_diffrn           1.356
_exptl_crystal_density_method           'not measured'
_exptl_crystal_F_000                    416
_exptl_special_details
;
 ?
;
 
#----------------------------------------------------------------------------#
#                   ABSORPTION CORRECTION                                    #
#----------------------------------------------------------------------------#
 
_exptl_absorpt_coefficient_mu           1.419
_exptl_absorpt_correction_type          multi-scan
_exptl_absorpt_process_details
;
        [c.f. r.h. blessing, acta cryst. (1995), a51, 33-38]
;
_exptl_absorpt_correction_T_min         0.8369
_exptl_absorpt_correction_T_max         0.9114
 
#----------------------------------------------------------------------------#
#                   DATA COLLECTION                                          #
#----------------------------------------------------------------------------#
 
_diffrn_ambient_temperature             298(2)
_diffrn_radiation_wavelength            0.71073
_diffrn_radiation_type                  MoK\a
_diffrn_radiation_monochromator         graphite
_diffrn_radiation_probe                 x-ray
_diffrn_orient_matrix_type              'by Nonius Collect from scalepack cell'
_diffrn_orient_matrix_ub_11             0.0838346
_diffrn_orient_matrix_ub_12             -0.0124977
_diffrn_orient_matrix_ub_13             0.0941256
_diffrn_orient_matrix_ub_21             -0.1598204
_diffrn_orient_matrix_ub_22             -0.0039926
_diffrn_orient_matrix_ub_23             0.022689
_diffrn_orient_matrix_ub_31             -0.0072319
_diffrn_orient_matrix_ub_32             -0.056643
_diffrn_orient_matrix_ub_33             -0.0223671
_diffrn_measurement_device              '95mm CCD camera on \k-goniostat'
_diffrn_measurement_device_type         KappaCCD
_diffrn_measurement_method              CCD
_diffrn_reflns_av_R_equivalents         0.0488
_diffrn_reflns_av_unetI/netI            0.0526
_diffrn_reflns_number                   8850
_diffrn_reflns_limit_h_min              -12
_diffrn_reflns_limit_h_max              13
_diffrn_reflns_limit_k_min              -21
_diffrn_reflns_limit_k_max              21
_diffrn_reflns_limit_l_min              -7
_diffrn_reflns_limit_l_max              5
_diffrn_reflns_theta_min                3.74
_diffrn_reflns_theta_max                27.91
_diffrn_reflns_theta_full               27.91
_diffrn_measured_fraction_theta_full
                                        0.973
_diffrn_measured_fraction_theta_max
                                        0.973
_reflns_number_total                    2388
_reflns_number_gt                       1488
_reflns_threshold_expression            >2sigma(I)
 
#----------------------------------------------------------------------------#
#                   COMPUTER PROGRAMS USED                                   #
#----------------------------------------------------------------------------#
 
_computing_data_collection              'Collect (Nonius BV, 1997-2000)'
_computing_cell_refinement
                                       'HKL Scalepack (Otwinowski & Minor 1997)'
_computing_data_reduction
                             'HKL Denzo and Scalepack (Otwinowski & Minor 1997)'
_computing_structure_solution           'SHELXS-97 (Sheldrick, 1997)'
_computing_structure_refinement         'SHELXL-97 (Sheldrick, 1997)'
_computing_molecular_graphics           'Ortep-3 for Windows (Farrugia, 1997)'
_computing_publication_material
                                   'WinGX publication routines (Farrugia, 1999)'
 
#----------------------------------------------------------------------------#
#                   REFINEMENT INFORMATION                                   #
#----------------------------------------------------------------------------#
 
_refine_special_details
;
 Refinement of F^2^ against ALL reflections.  The weighted R-factor wR and
 goodness of fit S are based on F^2^, conventional R-factors R are based
 on F, with F set to zero for negative F^2^. The threshold expression of
 F^2^ > 2sigma(F^2^) is used only for calculating R-factors(gt) etc. and is
 not relevant to the choice of reflections for refinement.  R-factors based
 on F^2^ are statistically about twice as large as those based on F, and R-
 factors based on ALL data will be even larger.
;
_refine_ls_structure_factor_coef        Fsqd
_refine_ls_matrix_type                  full
_refine_ls_weighting_scheme             calc
_refine_ls_weighting_details
         'calc w=1/[\s^2^(Fo^2^)+(0.0831P)^2^+0.8223P] where P=(Fo^2^+2Fc^2^)/3'
_atom_sites_solution_primary            direct
_atom_sites_solution_secondary          difmap
_atom_sites_solution_hydrogens          geom
_refine_ls_hydrogen_treatment           riding
_refine_ls_extinction_method            none
_refine_ls_number_reflns                2388
_refine_ls_number_parameters            97
_refine_ls_number_restraints            0
_refine_ls_R_factor_all                 0.0995
_refine_ls_R_factor_gt                  0.0549
_refine_ls_wR_factor_ref                0.1638
_refine_ls_wR_factor_gt                 0.1415
_refine_ls_goodness_of_fit_ref          1.038
_refine_ls_restrained_S_all             1.038
_refine_ls_shift/su_max                 0
_refine_ls_shift/su_mean                0
_refine_diff_density_max                0.54
_refine_diff_density_min                -0.73
_refine_diff_density_rms                0.092
 
#----------------------------------------------------------------------------#
#                   ATOMIC TYPES, COORDINATES AND THERMAL PARAMETERS         #
#----------------------------------------------------------------------------#
 
loop_
    _atom_type_symbol
    _atom_type_description
    _atom_type_scat_dispersion_real
    _atom_type_scat_dispersion_imag
    _atom_type_scat_source
C C 0.0033 0.0016 'International Tables Vol C Tables 4.2.6.8 and 6.1.1.4'
H H 0 0 'International Tables Vol C Tables 4.2.6.8 and 6.1.1.4'
Cl Cl 0.1484 0.1585 'International Tables Vol C Tables 4.2.6.8 and 6.1.1.4'
Sn Sn -0.6537 1.4246 'International Tables Vol C Tables 4.2.6.8 and 6.1.1.4'
 
loop_
    _atom_site_label
    _atom_site_type_symbol
    _atom_site_fract_x
    _atom_site_fract_y
    _atom_site_fract_z
    _atom_site_U_iso_or_equiv
    _atom_site_adp_type
    _atom_site_occupancy
    _atom_site_symmetry_multiplicity
    _atom_site_calc_flag
    _atom_site_refinement_flags
    _atom_site_disorder_assembly
    _atom_site_disorder_group
Sn Sn 0.03585(5) 0.25 0.28319(10) 0.0694(3) Uani 1 2 d S . .
Cl Cl 0.0333(4) 0.25 0.7045(6) 0.1359(13) Uani 1 2 d S . .
C1 C 0.1392(8) 0.3564(5) 0.2718(16) 0.102(2) Uani 1 1 d . . .
H1 H 0.1188 0.367 0.0958 0.123 Uiso 1 1 calc R . .
C2 C 0.2704(13) 0.3562(8) 0.349(6) 0.340(17) Uani 1 1 d . . .
H2A H 0.3019 0.3158 0.262 0.408 Uiso 1 1 calc R . .
H2B H 0.2988 0.3426 0.5218 0.408 Uiso 1 1 calc R . .
C3 C 0.3385(17) 0.4347(9) 0.316(6) 0.362(19) Uani 1 1 d . . .
H3A H 0.4341 0.4298 0.3846 0.434 Uiso 1 1 calc R . .
H3B H 0.3187 0.4464 0.1428 0.434 Uiso 1 1 calc R . .
C4 C 0.2933(17) 0.4960(9) 0.434(3) 0.190(6) Uani 1 1 d . . .
H4A H 0.3156 0.4862 0.6088 0.228 Uiso 1 1 calc R . .
H4B H 0.3336 0.5447 0.4089 0.228 Uiso 1 1 calc R . .
C5 C 0.1630(19) 0.4989(8) 0.335(6) 0.325(18) Uani 1 1 d . . .
H5A H 0.1432 0.5115 0.1623 0.39 Uiso 1 1 calc R . .
H5B H 0.1278 0.5404 0.4126 0.39 Uiso 1 1 calc R . .
C6 C 0.093(2) 0.4223(9) 0.361(6) 0.350(18) Uani 1 1 d . . .
H6A H 0.1018 0.4142 0.533 0.42 Uiso 1 1 calc R . .
H6B H -0.0012 0.4279 0.2754 0.42 Uiso 1 1 calc R . .
C7 C -0.1765(10) 0.25 0.101(2) 0.101(3) Uani 1 2 d S . .
H7 H -0.1814 0.25 -0.0731 0.121 Uiso 1 2 calc SR . .
C8 C -0.2427(10) 0.3175(8) 0.124(4) 0.272(12) Uani 1 1 d . . .
H8A H -0.2023 0.3606 0.0629 0.326 Uiso 1 1 calc R . .
H8B H -0.2309 0.3268 0.2965 0.326 Uiso 1 1 calc R . .
C9 C -0.3933(11) 0.3165(10) -0.014(5) 0.294(14) Uani 1 1 d . . .
H9A H -0.4345 0.3626 0.0284 0.353 Uiso 1 1 calc R . .
H9B H -0.4062 0.3175 -0.1896 0.353 Uiso 1 1 calc R . .
C10 C -0.4546(15) 0.25 0.045(4) 0.168(7) Uani 1 2 d S . .
H10A H -0.5484 0.25 -0.0456 0.202 Uiso 1 2 calc SR . .
H10B H -0.4463 0.25 0.219 0.202 Uiso 1 2 calc SR . .
 
loop_
    _atom_site_aniso_label
    _atom_site_aniso_U_11
    _atom_site_aniso_U_22
    _atom_site_aniso_U_33
    _atom_site_aniso_U_23
    _atom_site_aniso_U_13
    _atom_site_aniso_U_12
Sn 0.0643(4) 0.0778(4) 0.0692(4) 0 0.0245(3) 0
Cl 0.162(3) 0.183(4) 0.0743(16) 0 0.0533(18) 0
C1 0.100(5) 0.100(5) 0.112(6) -0.016(4) 0.039(4) -0.027(4)
C2 0.094(8) 0.101(8) 0.78(5) 0.028(16) 0.061(16) -0.025(7)
C3 0.156(13) 0.145(12) 0.83(6) -0.12(2) 0.22(2) -0.070(11)
C4 0.169(13) 0.171(12) 0.231(16) -0.089(11) 0.063(11) -0.094(11)
C5 0.170(14) 0.100(9) 0.71(6) -0.050(18) 0.14(2) -0.035(9)
C6 0.209(16) 0.109(10) 0.80(6) -0.087(17) 0.25(3) -0.057(11)
C7 0.057(5) 0.137(9) 0.113(8) 0 0.031(5) 0
C8 0.069(6) 0.127(9) 0.56(4) -0.021(14) 0.009(11) 0.014(6)
C9 0.075(7) 0.205(15) 0.55(4) 0.122(18) 0.009(12) 0.007(8)
C10 0.083(9) 0.26(2) 0.180(16) 0 0.063(10) 0
 
 
#----------------------------------------------------------------------------#
#                   MOLECULAR GEOMETRY                                       #
#----------------------------------------------------------------------------#
 
_geom_special_details
;
 All esds (except the esd in the dihedral angle between two l.s. planes)
 are estimated using the full covariance matrix.  The cell esds are taken
 into account individually in the estimation of esds in distances, angles
 and torsion angles; correlations between esds in cell parameters are only
 used when they are defined by crystal symmetry.  An approximate (isotropic)
 treatment of cell esds is used for estimating esds involving l.s. planes.
;
loop_
    _geom_bond_atom_site_label_1
    _geom_bond_atom_site_label_2
    _geom_bond_distance
    _geom_bond_site_symmetry_2
    _geom_bond_publ_flag
Sn C1 2.142(8) . ?
Sn C1 2.142(8) 4_565 ?
Sn C7 2.169(10) . ?
Sn Cl 2.415(3) . ?
Sn Cl 3.298(3) 1_554 ?
Cl Sn 3.298(3) 1_556 ?
C1 C2 1.320(15) . ?
C1 C6 1.389(17) . ?
C2 C3 1.568(19) . ?
C3 C4 1.41(2) . ?
C4 C5 1.32(2) . ?
C5 C6 1.541(18) . ?
C7 C8 1.380(13) . ?
C7 C8 1.380(13) 4_565 ?
C8 C9 1.548(16) . ?
C9 C10 1.404(16) . ?
C10 C9 1.404(16) 4_565 ?
 
loop_
    _geom_angle_atom_site_label_1
    _geom_angle_atom_site_label_2
    _geom_angle_atom_site_label_3
    _geom_angle
    _geom_angle_site_symmetry_1
    _geom_angle_site_symmetry_3
    _geom_angle_publ_flag
C1 Sn C1 117.5(5) . 4_565 ?
C1 Sn C7 116.6(3) . . ?
C1 Sn C7 116.6(3) 4_565 . ?
C1 Sn Cl 100.8(2) . . ?
C1 Sn Cl 100.8(2) 4_565 . ?
C7 Sn Cl 99.3(3) . . ?
C1 Sn Cl 79.7(2) . 1_554 ?
C1 Sn Cl 79.7(2) 4_565 1_554 ?
C7 Sn Cl 79.7(3) . 1_554 ?
Cl Sn Cl 178.96(18) . 1_554 ?
Sn Cl Sn 178.96(18) . 1_556 ?
C2 C1 C6 109.2(14) . . ?
C2 C1 Sn 118.6(8) . . ?
C6 C1 Sn 116.6(8) . . ?
C1 C2 C3 115.4(13) . . ?
C4 C3 C2 110.8(17) . . ?
C5 C4 C3 106.4(15) . . ?
C4 C5 C6 113.2(18) . . ?
C1 C6 C5 115.5(14) . . ?
C8 C7 C8 114.4(14) . 4_565 ?
C8 C7 Sn 115.7(7) . . ?
C8 C7 Sn 115.7(7) 4_565 . ?
C7 C8 C9 114.4(13) . . ?
C10 C9 C8 111.2(14) . . ?
C9 C10 C9 109(2) . 4_565 ?
 
#===END
